# Supplementary material for: Tautomerisation of thymine acts against the Hückel 4N + 2 rule. The effect of metal ions and H-bond complexations on the electronic structure of thymine
Source: Royal Society of Chemistry journal article supplement (doi:10.1039/c4ob00964a), 2014-01-01
Supplement: c4ob00964a1.pdf [file c4ob00964a1.pdf]

Supplementary Information for *Organic & Biomolecular Chemistry*  
O.A. Stasyuk, H. Szatyłowicz, T.M. Krygowski *Tautomerisation of thymine acts against the Hückel ...*

**Tautomerisation of thymine acts against the Hückel 4N+2 rule.  
Effect of metal ion and H-bond complexations on the electronic structure of thymine.**

Olga A. Stasyuk,<sup>a\*</sup> Halina Szatyłowicz,<sup>a\*</sup> Tadeusz M. Krygowski<sup>b</sup>

<sup>a</sup> Faculty of Chemistry, Warsaw University of Technology, Noakowskiego 3, 00-664 Warsaw (Poland) *ostasyuk@ch.pw.edu.pl; halina@ch.pw.edu.pl*

<sup>b</sup> Department of Chemistry, Warsaw University, Pasteura 1, 02-093 Warsaw (Poland) *tmkryg@chem.uw.edu.pl*

**Supplementary Information**

|                                                                                                                                                                                                   |      |
|---------------------------------------------------------------------------------------------------------------------------------------------------------------------------------------------------|------|
| <b>Table S1</b> Relative energies for thymine tautomers in comparison with previous studies                                                                                                       | 2SI  |
| <b>Table S2</b> Natural atomic 2p <sub>z</sub> orbital occupancies for thymine tautomers                                                                                                          | 2SI  |
| <b>Table S3</b> Energies of isomeric diazines, diazoles and triazoles                                                                                                                             | 3SI  |
| <b>Table S4</b> The main characteristics for H-bonded complexes of thymine tautomers                                                                                                              | 4SI  |
| <b>Table S5</b> Statistics of linear regressions between the H-bond energy and its length for H-bonded complexes of thymine tautomers                                                             | 5SI  |
| <b>Table S6</b> The main characteristics for metal complexes of thymine tautomers                                                                                                                 | 6SI  |
| <b>Table S7</b> Cartesian coordinates of equilibrium geometries for free tautomers of the thymine                                                                                                 | 7SI  |
| <b>Table S8</b> Cartesian coordinates of equilibrium geometries for H-bonding complexes of tautomers of the thymine                                                                               | 9SI  |
| <b>Table S9</b> Cartesian coordinates of equilibrium geometries for complexes of thymine tautomers with cations                                                                                   | 15SI |
| <b>Figure S1</b> Correlations between aromaticity indices: NICS's, HOMA and WBI <sub>Σ</sub>                                                                                                      | 21SI |
| <b>Figure S2</b> Wiberg bond indices for the most stable thymine tautomers                                                                                                                        | 22SI |
| <b>Figure S3</b> Structural parameters of thy1 and its complexes with Li <sup>+</sup>                                                                                                             | 22SI |
| <b>Figure S4</b> Relationships total energy of interactions, <i>E</i> <sub>tot</sub> , and aromaticity index HOMA against the amount of charge transfer, CT, for the studied complexes of thymine | 23SI |

**Table S1.** Relative energies for thymine tautomers in comparison with previous studies.<sup>a,b,c</sup>

| Tautomer | $E_{\text{rel}}$<br>/kcal/mol | $E_{\text{rel}}^{\text{a}}$<br>/kcal/mol | $E_{\text{rel}}^{\text{b}}$<br>/kcal/mol | $E_{\text{rel}}^{\text{c}}$<br>/kcal/mol | HOMA  |
|----------|-------------------------------|------------------------------------------|------------------------------------------|------------------------------------------|-------|
| thy1     | 0.00                          | 0.00                                     | 0.00                                     | 0.00                                     | 0.490 |
| thy2     | 10.83                         | 10.64                                    | 9.41                                     | 11.19                                    | 0.629 |
| thy3     | 12.38                         | 13.17                                    | 11.77                                    | 13.08                                    | 0.718 |
| thy4     | 13.02                         | 11.66                                    | 9.45                                     | 14.17                                    | 0.984 |
| thy5     | 14.17                         | 12.96                                    | 10.55                                    | 15.30                                    | 0.987 |
| thy6     | 18.25                         | 19.21                                    | 17.25                                    | 18.75                                    | 0.370 |
| thy7     | 18.41                         | 18.14                                    | 15.48                                    | 19.89                                    | 0.974 |
| thy8     | 18.46                         | 20.96                                    | 17.23                                    | 18.82                                    | 0.639 |
| thy9     | 18.52                         | 18.28                                    | 15.49                                    | 19.95                                    | 0.980 |
| thy10    | 19.30                         | 21.66                                    | 19.61                                    | 20.37                                    | 0.672 |
| thy11    | 22.66                         | 24.02                                    | 21.68                                    | 22.81                                    | 0.784 |
| thy12    | 25.31                         | 27.18                                    | 24.18                                    | 25.29                                    | 0.772 |
| thy13    | 27.99                         | 30.64                                    | 27.36                                    | 28.37                                    | 0.339 |

<sup>a</sup> - MP2/6-31G\*\* [T.-K. Ha, H. H. Gunthard *J. Am. Chem. Soc.* 1993,115, 11939-11950].

<sup>b</sup> - RI-MP2/TZVPP [J. Rejnek, M. Hanus, M. Kabelac, F. Ryjacek, P. Hobza *Phys. Chem. Chem. Phys.* 2005, 7, 2006].

<sup>c</sup> - B3LYP/6-311++G\*\* [J.-C. Fan, Z.-C. Shang, J. Liang, X.-H. Liu, H. Jin *J. Mol. Struct.: THEOCHEM* 939 (2010) 106–111].

**Table S2.** Natural atomic 2p<sub>z</sub> orbital occupancies for thymine tautomers.

| n         | Atom | Thy1  | Thy2  | Thy3   | Thy4  | Thy5  |
|-----------|------|-------|-------|--------|-------|-------|
| 1         | N    | 1.656 | 1.331 | 1.611  | 1.254 | 1.254 |
| 2         | C    | 0.826 | 0.870 | 0.832  | 0.874 | 0.869 |
| 3         | N    | 1.645 | 1.614 | 1.312  | 1.268 | 1.316 |
| 4         | C    | 0.808 | 0.825 | 0.894  | 0.889 | 0.877 |
| 5         | C    | 1.081 | 1.067 | 1.111  | 1.067 | 1.084 |
| 6         | C    | 0.960 | 0.925 | 0.924  | 0.890 | 0.887 |
| 8         | O    | 1.527 | 1.848 | 1.505  | 1.866 | 1.840 |
| 10        | O    | 1.469 | 1.492 | 1.826  | 1.866 | 1.840 |
| Sum total |      | 9.971 | 9.973 | 10.016 | 9.974 | 9.968 |
| Sum ring  |      | 6.976 | 6.633 | 6.685  | 6.242 | 6.288 |

**Table S3.** Energies of isomeric diazines, diazoles and triazoles.

|                | $E$ /hartree | $E_{\text{rel}}$ /kcal/mol |
|----------------|--------------|----------------------------|
| 1,2-diazine    | -264.36740   | 22.61                      |
| 1,3-diazine    | -264.40343   | 0.00                       |
| 1,4-diazine    | -264.39689   | 4.10                       |
| 1,2-diazole    | -226.27345   | 10.55                      |
| 1,3-diazole    | -226.29026   | 0.00                       |
| 1,2,3-triazole | -242.30776   | 6.28                       |
| 1,2,4-triazole | -242.31777   | 0.00                       |

**Table S4.** Characteristics for H-bonded complexes of thymine tautomers. Bolded values concern properties of free tautomers.

| Tautomer    | Interaction           | $d_{\text{HB}}$<br>/Å | $E_{\text{int}}$<br>/kcal/mol | $E_{\text{def}}$<br>/kcal/mol | $E_{\text{HB}}$<br>/kcal/mol | $d_{\text{C2O8}}$<br>/Å | $d_{\text{C4O10}}$<br>/Å | HOMA         |
|-------------|-----------------------|-----------------------|-------------------------------|-------------------------------|------------------------------|-------------------------|--------------------------|--------------|
| <b>thy1</b> | N1H...F <sup>-*</sup> | 1.499                 | -28.00                        | 4.71                          | -23.29                       | <b>1.213</b>            | <b>1.217</b>             | <b>0.490</b> |
|             | N3H...F <sup>-*</sup> | 1.583                 | -25.20                        | 3.02                          | -22.17                       | 1.233                   | 1.237                    | 0.369        |
|             | O8...HF               | 1.589                 | -13.69                        | 1.65                          | -12.04                       | 1.234                   | 1.214                    | 0.527        |
|             | O10...HF              | 1.648                 | -10.25                        | 0.72                          | -9.53                        | 1.211                   | 1.229                    | 0.574        |
| <b>thy2</b> | N1...HF               | 1.571                 | -16.00                        | 2.96                          | -13.04                       | <b>1.343</b>            | <b>1.219</b>             | <b>0.629</b> |
|             | N3H...F <sup>-*</sup> | 1.589                 | -23.98                        | 2.80                          | -21.19                       | 1.367                   | 1.238                    | 0.683        |
|             | O8...HF               | 1.822                 | -4.60                         | 0.34                          | -4.26                        | 1.359                   | 1.216                    | 0.595        |
|             | O8H...F <sup>-*</sup> | 1.503                 | -24.26                        | 2.64                          | -21.62                       | 1.257                   | 1.239                    | 0.778        |
|             | O10...HF              | 1.499                 | -10.91                        | 0.80                          | -10.12                       | 1.339                   | 1.232                    | 0.721        |
| <b>thy3</b> | N1H...F <sup>-*</sup> | 1.485                 | -29.69                        | 5.40                          | -24.28                       | <b>1.214</b>            | <b>1.345</b>             | <b>0.718</b> |
|             | N3...HF               | 1.600                 | -15.99                        | 2.75                          | -13.23                       | 1.212                   | 1.328                    | 0.745        |
|             | O8...HF               | 1.523                 | -17.05                        | 2.67                          | -14.38                       | 1.237                   | 1.340                    | 0.806        |
|             | O10...HF              | 1.773                 | -4.92                         | 0.41                          | -4.50                        | 1.212                   | 1.363                    | 0.734        |
|             | O10H...F <sup>-</sup> | 1.493                 | -25.37                        | 2.84                          | -22.53                       | 1.235                   | 1.264                    | 0.455        |
| <b>thy4</b> | N1...HF               | 1.571                 | -15.36                        | 2.76                          | -12.60                       | <b>1.345</b>            | <b>1.346</b>             | <b>0.984</b> |
|             | N3...HF               | 1.622                 | -14.16                        | 2.16                          | -11.99                       | 1.330                   | 1.342                    | 0.973        |
|             | O8...HF               | 1.795                 | -6.36                         | 0.28                          | -6.07                        | 1.341                   | 1.332                    | 0.980        |
|             | O8H...F <sup>-*</sup> | 1.462                 | -28.03                        | 3.77                          | -24.26                       | 1.357                   | 1.342                    | 0.978        |
|             | O10...HF              | 1.462                 | -28.03                        | 3.77                          | -24.26                       | 1.258                   | 1.374                    | 0.921        |
|             | O10H...F <sup>-</sup> | 1.765                 | -5.19                         | 0.39                          | -4.80                        | 1.342                   | 1.363                    | 0.989        |
| <b>thy5</b> | O10H...F <sup>-</sup> | 1.479                 | -26.37                        | 3.19                          | -23.18                       | 1.372                   | 1.265                    | 0.799        |
|             | N1...HF               | 1.677                 | -12.10                        | 0.94                          | -11.16                       | <b>1.346</b>            | <b>1.347</b>             | <b>0.987</b> |
|             | N3...HF               | 1.588                 | -12.81                        | 2.40                          | -10.41                       | 1.339                   | 1.342                    | 0.981        |
|             | O8...HF               | 1.808                 | -6.19                         | 0.25                          | -5.94                        | 1.342                   | 1.334                    | 0.984        |
|             | O8H...F <sup>-*</sup> | 1.451                 | -28.75                        | 4.15                          | -24.61                       | 1.358                   | 1.344                    | 0.981        |
|             | O10...HF              | 1.451                 | -28.75                        | 4.15                          | -24.61                       | 1.259                   | 1.373                    | 0.923        |
|             | O10H...F <sup>-</sup> | 1.768                 | -5.03                         | 0.36                          | -4.66                        | 1.343                   | 1.364                    | 0.991        |
|             |                       | 1.468                 | -27.13                        | 3.49                          | -23.65                       | 1.371                   | 1.266                    | 0.820        |

\* Proton transfer takes place

**Table S5.** Statistics of linear regressions between the H-bond energy and its length for H-bonded complexes of thymine tautomers,  $E_{\text{HB}}=a \cdot d_{\text{N}\cdots\text{H}} + b$ ;  $cc$  – correlation coefficients.

| Interaction      | a    | b      | cc    |
|------------------|------|--------|-------|
| O $\cdots$ HF    | 33.5 | -64.9  | 0.967 |
| N $\cdots$ HF    | 11.7 | -30.9  | 0.423 |
| O $^- \cdots$ HF | 56.0 | -106.0 | 0.989 |
| N $^- \cdots$ HF | 23.3 | -58.6  | 0.945 |

**Table S6.** The main characteristics for metal complexes of thymine tautomers. Energy in kcal/mol. Bolded HOMA values concern aromaticity of free tautomers.

|             | $E_{\text{rel}}$<br>(Li <sup>+</sup> ) | $E_{\text{rel}}$<br>(Na <sup>+</sup> ) | $E_{\text{rel}}$<br>(K <sup>+</sup> ) | HOMA<br>(Li <sup>+</sup> ) | HOMA<br>(Na <sup>+</sup> ) | HOMA<br>(K <sup>+</sup> ) | $E_{\text{def}}$<br>(Li <sup>+</sup> ) | $E_{\text{def}}$<br>(Na <sup>+</sup> ) | $E_{\text{def}}$<br>(K <sup>+</sup> ) | $E_{\text{int}}$<br>(Li <sup>+</sup> ) | $E_{\text{int}}$<br>(Na <sup>+</sup> ) | $E_{\text{int}}$<br>(K <sup>+</sup> ) | $E_{\text{tot}}$<br>(Li <sup>+</sup> ) | $E_{\text{tot}}$<br>(Na <sup>+</sup> ) | $E_{\text{tot}}$<br>(K <sup>+</sup> ) |
|-------------|----------------------------------------|----------------------------------------|---------------------------------------|----------------------------|----------------------------|---------------------------|----------------------------------------|----------------------------------------|---------------------------------------|----------------------------------------|----------------------------------------|---------------------------------------|----------------------------------------|----------------------------------------|---------------------------------------|
| <b>thy1</b> |                                        |                                        |                                       |                            | <b>0.490</b>               |                           |                                        |                                        |                                       |                                        |                                        |                                       |                                        |                                        |                                       |
| M··O8       | 2.48                                   | 2.00                                   | 1.72                                  | 0.450                      | 0.465                      | 0.472                     | 2.72                                   | 1.76                                   | 1.34                                  | -52.35                                 | -35.36                                 | -26.11                                | -49.63                                 | -33.60                                 | -24.77                                |
| M··O10      | 0.00                                   | 0.00                                   | 0.00                                  | 0.727                      | 0.688                      | 0.663                     | 2.51                                   | 1.59                                   | 1.21                                  | -54.59                                 | -37.12                                 | -27.66                                | -52.08                                 | -35.53                                 | -26.45                                |
| <b>thy2</b> |                                        |                                        |                                       |                            | <b>0.629</b>               |                           |                                        |                                        |                                       |                                        |                                        |                                       |                                        |                                        |                                       |
| M··N1       | 29.05                                  | 26.73                                  | 25.91                                 | 0.476                      | 0.505                      | 0.528                     | 1.92                                   | 1.47                                   | 1.14                                  | -35.88                                 | -21.22                                 | -12.56                                | -33.96                                 | -19.75                                 | -11.42                                |
| M··O8       | 42.69                                  | 36.27                                  | –                                     | 0.434                      | 0.472                      | –                         | 4.38                                   | 3.25                                   | –                                     | -24.68                                 | -13.62                                 | –                                     | -20.29                                 | -10.37                                 | –                                     |
| M··O10      | 7.90                                   | 8.56                                   | 8.89                                  | 0.884                      | 0.843                      | 0.818                     | 2.65                                   | 1.69                                   | 1.29                                  | -57.67                                 | -39.49                                 | -29.67                                | -55.02                                 | -37.81                                 | -28.38                                |
| <b>thy3</b> |                                        |                                        |                                       |                            | <b>0.718</b>               |                           |                                        |                                        |                                       |                                        |                                        |                                       |                                        |                                        |                                       |
| M··N3,O8    | 0.83                                   | 1.54                                   | 3.62                                  | 0.841                      | 0.829                      | 0.823                     | 3.25                                   | 1.83                                   | 1.27                                  | -66.78                                 | -48.17                                 | -36.49                                | -63.53                                 | -46.34                                 | -35.22                                |
| M··O10      | 34.47                                  | 31.34                                  | 29.55                                 | 0.704                      | 0.720                      | 0.728                     | 2.70                                   | 1.94                                   | 1.45                                  | -32.69                                 | -18.54                                 | -10.80                                | -29.99                                 | -16.60                                 | -9.35                                 |
| <b>thy4</b> |                                        |                                        |                                       |                            | <b>0.984</b>               |                           |                                        |                                        |                                       |                                        |                                        |                                       |                                        |                                        |                                       |
| M··N3,O8    | 16.78                                  | 15.35                                  | 16.37                                 | 0.946                      | 0.962                      | 0.970                     | 2.51                                   | 1.31                                   | 0.85                                  | -50.73                                 | -34.42                                 | -23.94                                | -48.22                                 | -33.11                                 | -23.08                                |
| M··O10      | 33.07                                  | 30.06                                  | 28.49                                 | 0.982                      | 0.987                      | 0.990                     | 2.49                                   | 1.76                                   | 1.31                                  | -34.53                                 | -20.29                                 | -12.36                                | -32.04                                 | -18.53                                 | -11.05                                |
| <b>thy5</b> |                                        |                                        |                                       |                            | <b>0.987</b>               |                           |                                        |                                        |                                       |                                        |                                        |                                       |                                        |                                        |                                       |
| M··N1,O8    | 11.31                                  | 10.01                                  | 11.45                                 | 0.942                      | 0.953                      | 0.959                     | 2.36                                   | 1.21                                   | 0.76                                  | -57.19                                 | -40.82                                 | -29.90                                | -54.83                                 | -39.62                                 | -29.14                                |
| M··O10      | 35.27                                  | 32.27                                  | 30.71                                 | 0.981                      | 0.986                      | 0.989                     | 2.48                                   | 1.74                                   | 1.28                                  | -33.47                                 | -19.22                                 | -11.26                                | -30.99                                 | -17.48                                 | -9.98                                 |

**Table S7** Cartesian coordinates of equilibrium geometries for free tautomers of the thymine.

|                                 |           |           |           |                                 |           |           |           |
|---------------------------------|-----------|-----------|-----------|---------------------------------|-----------|-----------|-----------|
| <b>thy1</b> $E=-454.28959$ a.u. |           |           |           | <b>thy2</b> $E=-454.27233$ a.u. |           |           |           |
| 7                               | 1.116416  | -1.240143 | 0.000006  | 7                               | -1.128068 | -1.302560 | -0.000022 |
| 6                               | 1.676236  | 0.025945  | 0.000000  | 6                               | -1.530944 | -0.076161 | 0.000000  |
| 7                               | 0.727609  | 1.030532  | -0.000014 | 7                               | -0.709301 | 0.996253  | 0.000007  |
| 6                               | -0.669525 | 0.895874  | -0.000007 | 6                               | 0.699067  | 0.886997  | -0.000015 |
| 6                               | -1.154324 | -0.486724 | 0.000001  | 6                               | 1.164471  | -0.489729 | -0.000004 |
| 6                               | -0.240881 | -1.475904 | 0.000008  | 6                               | 0.234669  | -1.482830 | -0.000021 |
| 1                               | 1.774440  | -2.000989 | 0.000016  | 8                               | -2.837270 | 0.234025  | 0.000006  |
| 8                               | 2.873566  | 0.222815  | 0.000004  | 1                               | -1.095249 | 1.929866  | 0.000025  |
| 1                               | 1.086878  | 1.974285  | -0.000016 | 8                               | 1.384682  | 1.894630  | 0.000022  |
| 8                               | -1.379375 | 1.884152  | -0.000005 | 6                               | 2.643007  | -0.729638 | 0.000013  |
| 6                               | -2.634475 | -0.716614 | 0.000004  | 1                               | 2.864270  | -1.795763 | 0.000017  |
| 1                               | -2.865737 | -1.780778 | 0.000010  | 1                               | 3.111555  | -0.275008 | -0.874013 |
| 1                               | -3.098239 | -0.258648 | 0.874259  | 1                               | 3.111538  | -0.275005 | 0.874046  |
| 1                               | -3.098240 | -0.258659 | -0.874257 | 1                               | 0.550577  | -2.518783 | -0.000030 |
| 1                               | -0.522996 | -2.519125 | 0.000014  | 1                               | -3.322015 | -0.602237 | -0.000006 |
| <b>thy3</b> $E=-454.26987$ a.u. |           |           |           | <b>thy4</b> $E=-454.26885$ a.u. |           |           |           |
| 7                               | -1.170469 | -1.204351 | 0.000008  | 7                               | -1.183558 | -1.267230 | 0.000002  |
| 6                               | -1.670583 | 0.116809  | -0.000019 | 6                               | -1.524617 | 0.014604  | 0.000001  |
| 7                               | -0.711014 | 1.104790  | 0.000004  | 7                               | -0.701303 | 1.058444  | -0.000001 |
| 6                               | 0.551336  | 0.790756  | 0.000016  | 6                               | 0.591326  | 0.775830  | 0.000014  |
| 6                               | 1.095974  | -0.535636 | 0.000008  | 6                               | 1.108026  | -0.529666 | 0.000011  |
| 6                               | 0.151250  | -1.510183 | 0.000015  | 6                               | 0.133945  | -1.512134 | 0.000006  |
| 8                               | -2.870233 | 0.303982  | -0.000025 | 8                               | -2.835910 | 0.312007  | -0.000027 |
| 8                               | 1.446362  | 1.794535  | -0.000011 | 8                               | 1.450747  | 1.811442  | -0.000008 |
| 6                               | 2.573696  | -0.798738 | 0.000006  | 6                               | 2.581443  | -0.814756 | 0.000012  |
| 1                               | 2.772372  | -1.869761 | 0.000001  | 1                               | 2.762701  | -1.888661 | 0.000010  |
| 1                               | 3.054738  | -0.363297 | -0.876572 | 1                               | 3.070187  | -0.386794 | -0.876387 |
| 1                               | 3.054737  | -0.363306 | 0.876589  | 1                               | 3.070184  | -0.386798 | 0.876414  |
| 1                               | 0.402159  | -2.561628 | 0.000023  | 1                               | 0.421893  | -2.557500 | 0.000009  |
| 1                               | 0.937226  | 2.618321  | -0.000006 | 1                               | -3.309845 | -0.529403 | -0.000032 |
| 1                               | -1.869918 | -1.929583 | 0.000013  | 1                               | 0.919479  | 2.619788  | -0.000018 |
| <b>thy5</b> $E=-454.26701$ a.u. |           |           |           | <b>thy6</b> $E=-454.26051$ a.u. |           |           |           |
| 7                               | -1.141968 | -1.336652 | -0.000004 | 7                               | -1.078388 | -1.232602 | -0.000034 |
| 6                               | -1.530077 | -0.074710 | -0.000026 | 6                               | -1.503952 | 0.054794  | 0.000004  |
| 7                               | -0.742812 | 1.005274  | -0.000019 | 7                               | -0.744918 | 1.088725  | -0.000006 |
| 6                               | 0.562117  | 0.778644  | -0.000016 | 6                               | 0.649377  | 0.921417  | -0.000152 |
| 6                               | 1.123717  | -0.505432 | 0.000003  | 6                               | 1.165778  | -0.467984 | -0.000044 |
| 6                               | 0.183786  | -1.523247 | 0.000009  | 6                               | 0.283605  | -1.481881 | -0.000044 |
| 8                               | -2.858152 | 0.141327  | 0.000009  | 8                               | -2.845699 | 0.165682  | 0.000040  |
| 8                               | 1.381648  | 1.847607  | 0.000004  | 8                               | 1.399478  | 1.881072  | 0.000139  |
| 6                               | 2.606361  | -0.738042 | 0.000020  | 6                               | 2.648069  | -0.669940 | 0.000023  |
| 1                               | 2.824657  | -1.804980 | 0.000035  | 1                               | 2.908729  | -1.727844 | 0.000085  |
| 1                               | 3.080166  | -0.293933 | -0.876558 | 1                               | 3.097178  | -0.194252 | -0.872412 |
| 1                               | 3.080150  | -0.293912 | 0.876595  | 1                               | 3.097117  | -0.194164 | 0.872441  |

|   |           |           |          |
|---|-----------|-----------|----------|
| 1 | 0.514369  | -2.556302 | 0.000022 |
| 1 | -2.994047 | 1.096380  | 0.000017 |
| 1 | 0.824772  | 2.637644  | 0.000002 |

**thy7**  $E=-454.26026$  a.u.

|   |           |           |           |
|---|-----------|-----------|-----------|
| 7 | -1.206333 | -1.250670 | -0.000008 |
| 6 | -1.533150 | 0.037767  | -0.000021 |
| 7 | -0.707418 | 1.076944  | -0.000013 |
| 6 | 0.579834  | 0.791085  | -0.000005 |
| 6 | 1.083462  | -0.525245 | 0.000005  |
| 6 | 0.106603  | -1.504527 | 0.000003  |
| 8 | -2.842260 | 0.342171  | -0.000004 |
| 8 | 1.395765  | 1.867080  | 0.000008  |
| 6 | 2.554625  | -0.834736 | 0.000018  |
| 1 | 2.717477  | -1.911203 | 0.000026  |
| 1 | 3.059624  | -0.433631 | -0.883276 |
| 1 | 3.059610  | -0.433620 | 0.883316  |
| 1 | 0.389329  | -2.551617 | 0.000010  |
| 1 | -3.321178 | -0.496241 | 0.000003  |
| 1 | 2.315108  | 1.582320  | 0.000026  |

**thy9**  $E=-454.26007$  a.u.

|   |           |           |           |
|---|-----------|-----------|-----------|
| 7 | -1.167074 | -1.320955 | -0.000005 |
| 6 | -1.539606 | -0.051224 | -0.000020 |
| 7 | -0.748319 | 1.022673  | -0.000014 |
| 6 | 0.551400  | 0.792051  | -0.000005 |
| 6 | 1.098779  | -0.503442 | 0.000007  |
| 6 | 0.154422  | -1.517309 | 0.000007  |
| 8 | -2.864379 | 0.176763  | -0.000006 |
| 8 | 1.323101  | 1.900674  | 0.000003  |
| 6 | 2.579901  | -0.761237 | 0.000020  |
| 1 | 2.779309  | -1.831525 | 0.000030  |
| 1 | 3.071153  | -0.343651 | -0.883407 |
| 1 | 3.071140  | -0.343638 | 0.883447  |
| 1 | 0.478987  | -2.552602 | 0.000016  |
| 1 | -2.985042 | 1.134513  | -0.000006 |
| 1 | 2.253052  | 1.652341  | 0.000020  |

**thy11**  $E=-454.25348$  a.u.

|   |           |           |           |
|---|-----------|-----------|-----------|
| 7 | -1.213417 | -1.340945 | -0.000011 |
| 6 | -1.712903 | -0.058350 | -0.000033 |
| 7 | -0.734219 | 0.980046  | 0.000002  |
| 6 | 0.593182  | 0.765432  | 0.000002  |
| 6 | 1.085407  | -0.517028 | -0.000004 |
| 6 | 0.083182  | -1.516867 | -0.000002 |
| 8 | -2.884725 | 0.252198  | 0.000023  |
| 8 | 1.327834  | 1.892526  | 0.000010  |
| 6 | 2.558021  | -0.824557 | -0.000001 |
| 1 | 2.711978  | -1.902432 | -0.000006 |

|   |           |           |           |
|---|-----------|-----------|-----------|
| 1 | 0.565947  | -2.524241 | -0.000026 |
| 1 | -3.039706 | 1.112928  | 0.000063  |
| 1 | -1.753625 | -1.977759 | -0.000027 |

**thy8**  $E=-454.26018$  a.u.

|   |           |           |           |
|---|-----------|-----------|-----------|
| 7 | -1.091534 | -1.344455 | -0.000076 |
| 6 | -1.539246 | -0.138089 | 0.000006  |
| 7 | -0.734200 | 0.959265  | -0.000040 |
| 6 | 0.680998  | 0.889195  | -0.000313 |
| 6 | 1.181708  | -0.469849 | -0.000079 |
| 6 | 0.272520  | -1.483672 | -0.000095 |
| 8 | -2.873944 | 0.047079  | 0.000146  |
| 1 | -1.104180 | 1.899501  | 0.000070  |
| 8 | 1.330019  | 1.921785  | 0.000185  |
| 6 | 2.665556  | -0.675217 | 0.000079  |
| 1 | 2.910368  | -1.736158 | 0.000212  |
| 1 | 3.123859  | -0.210855 | -0.874249 |
| 1 | 3.123713  | -0.210671 | 0.874386  |
| 1 | 0.615827  | -2.511225 | -0.000039 |
| 1 | -3.107263 | 0.980613  | 0.000201  |

**thy10**  $E=-454.25882$  a.u.

|   |           |           |           |
|---|-----------|-----------|-----------|
| 7 | -1.191411 | -1.188529 | 0.000035  |
| 6 | -1.678547 | 0.141726  | 0.000162  |
| 7 | -0.716660 | 1.124552  | 0.000010  |
| 6 | 0.540095  | 0.810138  | -0.000024 |
| 6 | 1.071995  | -0.530189 | 0.000019  |
| 6 | 0.124469  | -1.501814 | 0.000009  |
| 8 | -2.877160 | 0.331052  | -0.000138 |
| 8 | 1.393898  | 1.857003  | -0.000029 |
| 6 | 2.546430  | -0.822187 | 0.000010  |
| 1 | 2.724384  | -1.896289 | 0.000021  |
| 1 | 3.046155  | -0.415554 | -0.883658 |
| 1 | 3.046172  | -0.415532 | 0.883660  |
| 1 | 0.371651  | -2.554423 | -0.000028 |
| 1 | 2.304954  | 1.546655  | -0.000004 |
| 1 | -1.897388 | -1.907494 | -0.000018 |

**thy12**  $E=-454.24925$  a.u.

|   |           |           |           |
|---|-----------|-----------|-----------|
| 7 | 1.204644  | -1.351835 | -0.000009 |
| 6 | 1.708688  | -0.076775 | 0.000099  |
| 7 | 0.730101  | 0.969853  | 0.000023  |
| 6 | -0.604900 | 0.762260  | -0.000003 |
| 6 | -1.095679 | -0.518683 | 0.000013  |
| 6 | -0.095618 | -1.519163 | -0.000013 |
| 8 | 2.879678  | 0.240370  | -0.000061 |
| 8 | -1.439709 | 1.818608  | -0.000029 |
| 6 | -2.567345 | -0.825153 | 0.000010  |
| 1 | -2.721466 | -1.903123 | 0.000009  |



|                                  |           |           |           |   |           |           |           |
|----------------------------------|-----------|-----------|-----------|---|-----------|-----------|-----------|
| 1                                | 3.069307  | -0.433848 | -0.884439 | 1 | -3.069161 | -0.416463 | 0.878282  |
| 1                                | 3.069301  | -0.433858 | 0.884445  | 1 | -3.069157 | -0.416463 | -0.878264 |
| 1                                | 0.414796  | -2.553266 | 0.000006  | 1 | -0.431874 | -2.553554 | -0.000023 |
| 1                                | 2.265880  | 1.672745  | 0.000009  | 1 | -0.962400 | 2.655380  | -0.000015 |
| 1                                | -1.084012 | 1.927381  | 0.000007  | 1 | 1.120216  | 1.901347  | -0.000004 |
| <b>thy13</b> $E=-454.24498$ a.u. |           |           |           |   |           |           |           |
| 7                                | -1.099545 | -1.194573 | -0.000934 |   |           |           |           |
| 6                                | -1.505539 | 0.112609  | 0.001797  |   |           |           |           |
| 7                                | -0.716680 | 1.116543  | 0.010740  |   |           |           |           |
| 6                                | 0.671726  | 0.916523  | -0.002003 |   |           |           |           |
| 6                                | 1.163399  | -0.481677 | 0.003810  |   |           |           |           |
| 6                                | 0.260387  | -1.474330 | -0.005089 |   |           |           |           |
| 8                                | -2.838721 | 0.341269  | -0.010256 |   |           |           |           |
| 8                                | 1.443287  | 1.858482  | -0.013056 |   |           |           |           |
| 6                                | 2.640744  | -0.714519 | 0.010630  |   |           |           |           |
| 1                                | 2.880220  | -1.777476 | 0.005882  |   |           |           |           |
| 1                                | 3.103148  | -0.241726 | -0.856261 |   |           |           |           |
| 1                                | 3.094263  | -0.252791 | 0.888319  |   |           |           |           |
| 1                                | 0.517029  | -2.523479 | -0.011147 |   |           |           |           |
| 1                                | -3.344210 | -0.461886 | 0.149625  |   |           |           |           |
| 1                                | -1.757701 | -1.946082 | -0.113427 |   |           |           |           |

**Table S8** Cartesian coordinates of equilibrium geometries for H-bonding complexes of tautomers of the thymine.

|                                                     |           |           |           |                                                     |           |           |           |
|-----------------------------------------------------|-----------|-----------|-----------|-----------------------------------------------------|-----------|-----------|-----------|
| <b>thy1 N1H...F<sup>-</sup></b> $E=-554.26729$ a.u. |           |           |           | <b>thy1 N3H...F<sup>-</sup></b> $E=-554.24674$ a.u. |           |           |           |
| N                                                   | 1.201194  | 0.216975  | 0.000001  | N                                                   | 0.260388  | 1.874345  | 0.000023  |
| C                                                   | 0.897367  | -1.112702 | 0.000016  | C                                                   | -0.944087 | 1.131132  | -0.000010 |
| N                                                   | -0.472645 | -1.425066 | 0.000014  | N                                                   | -0.833233 | -0.216943 | 0.000021  |
| C                                                   | -1.548981 | -0.542913 | 0.000017  | C                                                   | 0.381361  | -0.861420 | 0.000132  |
| C                                                   | -1.155009 | 0.841520  | 0.000005  | C                                                   | 1.623222  | -0.049286 | 0.000036  |
| C                                                   | 0.189844  | 1.109151  | -0.000002 | C                                                   | 1.497056  | 1.288620  | 0.000032  |
| H                                                   | 2.577422  | 0.811197  | -0.000017 | H                                                   | 0.145845  | 2.871898  | 0.000009  |
| O                                                   | 1.718850  | -2.028796 | -0.000004 | O                                                   | -1.996960 | 1.773396  | -0.000051 |
| H                                                   | -0.696170 | -2.408080 | 0.000011  | H                                                   | -2.161414 | -1.077495 | -0.000072 |
| O                                                   | -2.709806 | -0.974035 | 0.000007  | O                                                   | 0.469159  | -2.095541 | -0.000082 |
| C                                                   | -2.212415 | 1.906184  | -0.000002 | C                                                   | 2.945866  | -0.752045 | -0.000008 |
| H                                                   | -1.757545 | 2.898284  | -0.000012 | H                                                   | 3.772722  | -0.037628 | -0.000061 |
| H                                                   | -2.864110 | 1.829454  | -0.874498 | H                                                   | 3.044606  | -1.401720 | 0.872147  |
| H                                                   | -2.864105 | 1.829469  | 0.874499  | H                                                   | 3.044532  | -1.401762 | -0.872141 |
| H                                                   | 0.517337  | 2.145658  | -0.000013 | H                                                   | 2.345805  | 1.962690  | 0.000016  |
| F                                                   | 3.432238  | 1.351763  | -0.000033 | F                                                   | -2.997810 | -1.609183 | -0.000026 |

**thy1 O8...HF**  $E=-554.79536$  a.u.

|   |           |           |           |
|---|-----------|-----------|-----------|
| N | 0.874042  | 0.756952  | -0.000086 |
| C | 1.023235  | -0.604177 | -0.000053 |
| N | -0.153336 | -1.301106 | 0.000023  |
| C | -1.458757 | -0.768041 | 0.000096  |
| C | -1.519471 | 0.693820  | 0.000069  |
| C | -0.357716 | 1.375199  | -0.000021 |
| H | 1.736012  | 1.289945  | -0.000160 |
| O | 2.123400  | -1.162052 | -0.000148 |
| H | -0.078146 | -2.308606 | 0.000022  |
| O | -2.417089 | -1.514048 | 0.000153  |
| C | -2.868396 | 1.344469  | 0.000135  |
| H | -2.779190 | 2.429442  | 0.000107  |
| H | -3.444559 | 1.040636  | -0.874299 |
| H | -3.444455 | 1.040673  | 0.874650  |
| H | -0.322156 | 2.454843  | -0.000052 |
| H | 3.278731  | -0.070717 | -0.000123 |
| F | 3.716107  | 0.788227  | -0.000122 |

**thy2 N1...HF**  $E=-554.78009$  a.u.

|   |           |           |           |
|---|-----------|-----------|-----------|
| N | 0.986891  | 0.679611  | 0.000097  |
| C | 0.961416  | -0.625199 | 0.000138  |
| N | -0.186807 | -1.329412 | 0.000161  |
| C | -1.472639 | -0.736274 | -0.000011 |
| C | -1.436468 | 0.718307  | 0.000084  |
| C | -0.225391 | 1.330154  | 0.000143  |
| O | 2.070691  | -1.352045 | 0.000217  |
| H | -0.148605 | -2.339378 | 0.000032  |
| O | -2.461843 | -1.443174 | -0.000407 |
| C | -2.741891 | 1.452051  | 0.000050  |
| H | -2.583569 | 2.529019  | -0.000027 |
| H | -3.336902 | 1.185148  | -0.874230 |
| H | -3.336906 | 1.185263  | 0.874362  |
| H | -0.155261 | 2.409754  | 0.000192  |
| H | 2.843019  | -0.746942 | 0.000243  |
| H | 2.496403  | 1.116593  | 0.000096  |
| F | 3.471144  | 0.970741  | -0.000376 |

**thy2 O8...HF**  $E=-554.76544$  a.u.

|   |           |           |           |
|---|-----------|-----------|-----------|
| N | 0.031899  | -1.810484 | -0.000040 |
| C | -0.829647 | -0.855536 | -0.000015 |
| N | -0.536606 | 0.459256  | -0.000018 |
| C | 0.797646  | 0.934327  | -0.000083 |
| C | 1.787882  | -0.132388 | -0.000025 |
| C | 1.352046  | -1.419363 | -0.000039 |
| O | -2.158308 | -1.139193 | 0.000016  |
| H | -1.277531 | 1.152498  | 0.000018  |
| O | 1.014721  | 2.131270  | 0.000053  |

**thy1 O10...HF**  $E=-554.79126$  a.u.

|   |           |           |           |
|---|-----------|-----------|-----------|
| N | 2.034195  | 0.922365  | -0.000009 |
| C | 2.147619  | -0.457048 | 0.000026  |
| N | 0.915824  | -1.091110 | -0.000095 |
| C | -0.344408 | -0.501856 | -0.000089 |
| C | -0.360272 | 0.955487  | -0.000033 |
| C | 0.832266  | 1.587303  | -0.000001 |
| H | 2.905381  | 1.426493  | 0.000069  |
| O | 3.207677  | -1.042129 | 0.000118  |
| H | 0.941179  | -2.101212 | -0.000047 |
| O | -1.333705 | -1.230378 | -0.000093 |
| C | -1.674503 | 1.676910  | -0.000005 |
| H | -1.520770 | 2.754672  | -0.000097 |
| H | -2.271313 | 1.412086  | -0.872659 |
| H | -2.271209 | 1.412223  | 0.872764  |
| H | 0.905554  | 2.665289  | 0.000027  |
| H | -2.955703 | -0.936726 | 0.000074  |
| F | -3.886582 | -0.759592 | 0.000111  |

**thy2 N3H...F<sup>-</sup>**  $E=-554.24196$  a.u.

|   |           |           |           |
|---|-----------|-----------|-----------|
| N | 0.156726  | 1.933941  | 0.000015  |
| C | -0.829997 | 1.048194  | 0.000006  |
| N | -0.768393 | -0.270220 | -0.000018 |
| C | 0.488680  | -0.869516 | -0.000054 |
| C | 1.636402  | 0.032523  | -0.000005 |
| C | 1.395697  | 1.373500  | 0.000013  |
| O | -2.090708 | 1.577456  | 0.000021  |
| H | -2.091452 | -1.151116 | -0.000009 |
| O | 0.616233  | -2.101064 | -0.000008 |
| C | 3.014443  | -0.557473 | 0.000011  |
| H | 3.776186  | 0.225664  | 0.000044  |
| H | 3.171240  | -1.196814 | 0.872439  |
| H | 3.171275  | -1.196777 | -0.872438 |
| H | 2.224478  | 2.077637  | 0.000035  |
| H | -1.946692 | 2.531283  | 0.000034  |
| F | -2.939880 | -1.656714 | -0.000002 |

**thy2 O8H...F<sup>-</sup>**  $E=-554.26412$  a.u.

|   |           |           |           |
|---|-----------|-----------|-----------|
| N | -0.724615 | -1.068388 | -0.000055 |
| C | -0.990074 | 0.246382  | -0.000081 |
| N | 0.081144  | 1.138964  | -0.000020 |
| C | 1.436051  | 0.813976  | -0.000010 |
| C | 1.676367  | -0.602240 | -0.000006 |
| C | 0.573609  | -1.425417 | -0.000025 |
| O | -2.140479 | 0.753266  | -0.000011 |
| H | -0.148809 | 2.120824  | 0.000019  |
| O | 2.292240  | 1.709987  | 0.000081  |

|   |           |           |           |
|---|-----------|-----------|-----------|
| C | 3.233283  | 0.259039  | 0.000022  |
| H | 3.875372  | -0.620135 | 0.000051  |
| H | 3.470371  | 0.867300  | -0.873881 |
| H | 3.470314  | 0.867316  | 0.873928  |
| H | 2.063315  | -2.235454 | -0.000028 |
| H | -2.240780 | -2.102742 | 0.000012  |
| H | -3.325893 | 0.259740  | 0.000053  |
| F | -3.488976 | 1.179665  | 0.000060  |

**thy2 O10...HF**  $E=-554.77495$  a.u.

|   |           |           |           |
|---|-----------|-----------|-----------|
| N | -2.059304 | 0.990957  | -0.000085 |
| C | -2.045113 | -0.300423 | -0.000023 |
| N | -0.915600 | -1.043746 | 0.000025  |
| C | 0.365620  | -0.480125 | 0.000069  |
| C | 0.374083  | 0.963888  | -0.000001 |
| C | -0.832917 | 1.600710  | -0.000090 |
| O | -3.173437 | -1.021415 | 0.000002  |
| H | -0.972228 | -2.053083 | 0.000039  |
| O | 1.334503  | -1.240890 | 0.000135  |
| C | 1.687624  | 1.685790  | 0.000130  |
| H | 1.531252  | 2.762985  | -0.001039 |
| H | 2.285003  | 1.422003  | 0.873240  |
| H | 2.286235  | 1.420202  | -0.871557 |
| H | -0.867675 | 2.682894  | -0.000192 |
| H | -3.910485 | -0.395709 | -0.000057 |
| H | 2.946445  | -0.962075 | -0.000118 |
| F | 3.882386  | -0.803144 | -0.000167 |

**thy3 N3...HF**  $E=-554.77796$  a.u.

|   |           |           |           |
|---|-----------|-----------|-----------|
| N | 0.425694  | 1.950425  | -0.000066 |
| C | -0.866331 | 1.392889  | -0.000041 |
| N | -0.897372 | 0.013481  | -0.000051 |
| C | 0.210010  | -0.696820 | 0.000172  |
| C | 1.530987  | -0.143144 | -0.000009 |
| C | 1.565263  | 1.213664  | -0.000111 |
| O | -1.844666 | 2.107852  | 0.000376  |
| O | 0.121198  | -2.021835 | 0.000396  |
| C | 2.752705  | -1.014193 | -0.000016 |
| H | 3.656347  | -0.406606 | -0.000157 |
| H | 2.776448  | -1.662316 | 0.876442  |
| H | 2.776323  | -1.662515 | -0.876330 |
| H | 2.493171  | 1.767959  | -0.000215 |
| H | -0.825330 | -2.284127 | -0.000116 |
| H | 0.458175  | 2.957580  | -0.000116 |
| H | -2.161381 | -0.967631 | -0.000035 |
| F | -2.582230 | -1.854688 | -0.000534 |

|   |           |           |           |
|---|-----------|-----------|-----------|
| C | 3.089773  | -1.105768 | 0.000019  |
| H | 3.107643  | -2.197336 | 0.000016  |
| H | 3.644813  | -0.755146 | -0.874356 |
| H | 3.644780  | -0.755152 | 0.874418  |
| H | 0.741978  | -2.501535 | -0.000042 |
| H | -3.428227 | -0.021334 | 0.000031  |
| F | -4.331815 | -0.405776 | 0.000055  |

**thy3 N1H...F<sup>-</sup>**  $E=-554.23836$  a.u.

|   |           |           |           |
|---|-----------|-----------|-----------|
| N | 1.211212  | 0.188235  | 0.000002  |
| C | 0.849570  | -1.162679 | -0.000011 |
| N | -0.511487 | -1.476897 | -0.000010 |
| C | -1.389678 | -0.514244 | 0.000000  |
| C | -1.102287 | 0.861672  | 0.000004  |
| C | 0.260244  | 1.113681  | 0.000006  |
| O | 1.704225  | -2.047275 | -0.000002 |
| O | -2.710888 | -0.890976 | -0.000013 |
| C | -2.153606 | 1.934223  | 0.000009  |
| H | -1.683741 | 2.919757  | 0.000012  |
| H | -2.805247 | 1.877555  | -0.876721 |
| H | -2.805244 | 1.877549  | 0.876741  |
| H | 0.613572  | 2.142750  | 0.000012  |
| H | -2.674692 | -1.857754 | -0.000020 |
| H | 2.592309  | 0.735216  | 0.000003  |
| F | 3.459201  | 1.270628  | 0.000010  |

**thy3 O8...HF**  $E=-554.77949$  a.u.

|   |           |           |           |
|---|-----------|-----------|-----------|
| N | 0.903915  | 0.743881  | 0.000037  |
| C | 1.002188  | -0.647554 | -0.000063 |
| N | -0.164674 | -1.346567 | -0.000083 |
| C | -1.302038 | -0.703542 | 0.000011  |
| C | -1.461471 | 0.716482  | 0.000112  |
| C | -0.283987 | 1.395637  | 0.000123  |
| O | 2.117534  | -1.182986 | -0.000179 |
| O | -2.427810 | -1.431067 | -0.000029 |
| C | -2.809738 | 1.374526  | 0.000194  |
| H | -2.707306 | 2.458575  | 0.000260  |
| H | -3.390783 | 1.086634  | -0.876485 |
| H | -3.390731 | 1.086522  | 0.876871  |
| H | -0.235241 | 2.475088  | 0.000195  |
| H | -2.163091 | -2.362854 | -0.000111 |
| H | 1.786747  | 1.247254  | 0.000048  |
| H | 3.222823  | -0.134963 | -0.000161 |
| F | 3.701708  | 0.717964  | -0.000099 |

**thy3 O10...HF**  $E=-554.76354$  a.u.

|   |           |           |           |
|---|-----------|-----------|-----------|
| N | 2.023849  | 0.862116  | -0.247265 |
| C | 2.086322  | -0.540840 | -0.091015 |
| N | 0.875650  | -1.146362 | 0.177513  |
| C | -0.200980 | -0.432077 | 0.273453  |
| C | -0.308033 | 0.986240  | 0.134642  |
| C | 0.883540  | 1.584224  | -0.134324 |
| O | 3.148388  | -1.114467 | -0.196454 |
| O | -1.351415 | -1.109117 | 0.547933  |
| C | -1.600865 | 1.735746  | 0.283758  |
| H | -1.431059 | 2.806450  | 0.180934  |
| H | -2.333471 | 1.437780  | -0.466699 |
| H | -2.051830 | 1.559195  | 1.260999  |
| H | 0.975184  | 2.653047  | -0.266552 |
| H | -1.103096 | -2.043293 | 0.628442  |
| H | 2.903798  | 1.312135  | -0.445324 |
| H | -2.936160 | -0.891595 | -0.216484 |
| F | -3.761728 | -0.783898 | -0.644218 |

**thy4 N1...HF**  $E=-554.77583$  a.u.

|   |           |           |           |
|---|-----------|-----------|-----------|
| N | -1.023645 | 0.627666  | -0.002052 |
| C | -0.915488 | -0.704202 | -0.001098 |
| N | 0.230154  | -1.377801 | 0.000085  |
| C | 1.339281  | -0.659431 | 0.000857  |
| C | 1.370847  | 0.748744  | -0.000108 |
| C | 0.121992  | 1.329711  | -0.001430 |
| O | -2.026299 | -1.436506 | -0.001434 |
| O | 2.505578  | -1.322337 | 0.001336  |
| C | 2.654106  | 1.526071  | 0.000210  |
| H | 2.453510  | 2.596208  | -0.000679 |
| H | 3.258578  | 1.292434  | 0.877432  |
| H | 3.259779  | 1.291199  | -0.875849 |
| H | 0.016215  | 2.407363  | -0.002216 |
| H | -2.802694 | -0.845401 | -0.000747 |
| H | 2.299683  | -2.267953 | 0.001426  |
| H | -2.539410 | 1.039423  | -0.000520 |
| F | -3.516654 | 0.929230  | 0.002790  |

**thy4 O8...HF**  $E=-554.76466$  a.u.

|   |           |           |           |
|---|-----------|-----------|-----------|
| N | 0.005783  | -1.742552 | 0.000021  |
| C | -0.781455 | -0.684075 | 0.000040  |
| N | -0.425926 | 0.591811  | 0.000017  |
| C | 0.878193  | 0.823087  | 0.000003  |
| C | 1.848887  | -0.193626 | 0.000009  |
| C | 1.321312  | -1.471479 | 0.000006  |
| O | -2.120331 | -0.905913 | -0.000011 |
| O | 1.282051  | 2.103112  | 0.000010  |
| C | 3.320270  | 0.100489  | 0.000014  |

**thy3 O10H...F<sup>-</sup>**  $E=-554.24708$  a.u.

|   |           |           |           |
|---|-----------|-----------|-----------|
| N | 2.175069  | -0.063405 | 0.000010  |
| C | 1.374008  | -1.235836 | -0.000015 |
| N | 0.034315  | -1.069857 | -0.000045 |
| C | -0.526555 | 0.153419  | -0.000077 |
| C | 0.307603  | 1.371369  | -0.000011 |
| C | 1.642314  | 1.193823  | 0.000011  |
| O | 1.975210  | -2.314959 | 0.000010  |
| O | -1.779043 | 0.321035  | -0.000012 |
| C | -0.343157 | 2.721042  | 0.000015  |
| H | 0.404021  | 3.518641  | 0.000060  |
| H | -0.987796 | 2.846753  | -0.872222 |
| H | -0.987843 | 2.846701  | 0.872225  |
| H | 2.347178  | 2.016889  | 0.000039  |
| H | -2.842761 | -0.727300 | 0.000029  |
| H | 3.167940  | -0.216829 | 0.000033  |
| F | -3.651227 | -1.291504 | 0.000062  |

**thy4 N3...HF**  $E=-554.77487$  a.u.

|   |           |           |           |
|---|-----------|-----------|-----------|
| N | 0.242199  | -2.032801 | 0.000410  |
| C | -0.832127 | -1.266410 | -0.000211 |
| N | -0.850294 | 0.067435  | -0.000872 |
| C | 0.330648  | 0.689345  | -0.000448 |
| C | 1.550817  | -0.008569 | 0.000085  |
| C | 1.417983  | -1.383405 | 0.000496  |
| O | -2.038856 | -1.850219 | -0.000322 |
| O | 0.347553  | 2.021178  | -0.000825 |
| C | 2.871477  | 0.703363  | 0.000281  |
| H | 3.691357  | -0.013063 | 0.000711  |
| H | 2.976476  | 1.343824  | -0.876188 |
| H | 2.975944  | 1.344294  | 0.876471  |
| H | 2.302063  | -2.010408 | 0.000912  |
| H | -1.890717 | -2.804767 | 0.000036  |
| H | -0.569135 | 2.362297  | -0.000814 |
| H | -2.047975 | 1.161793  | -0.000303 |
| F | -2.409301 | 2.066664  | 0.001152  |

**thy4 O8H...F<sup>-</sup>**  $E=-554.23788$  a.u.

|   |           |           |           |
|---|-----------|-----------|-----------|
| N | -0.779919 | -1.017477 | -0.000018 |
| C | -0.981365 | 0.342771  | -0.000032 |
| N | 0.088950  | 1.215967  | -0.000015 |
| C | 1.299167  | 0.717132  | 0.000000  |
| C | 1.610970  | -0.645941 | 0.000008  |
| C | 0.470437  | -1.447266 | -0.000002 |
| O | -2.144764 | 0.822421  | -0.000027 |
| O | 2.331279  | 1.623867  | 0.000015  |
| C | 3.013521  | -1.182805 | 0.000026  |

|   |           |           |           |
|---|-----------|-----------|-----------|
| H | 3.894792  | -0.824460 | 0.000018  |
| H | 3.608512  | 0.682067  | -0.876533 |
| H | 3.608509  | 0.682071  | 0.876559  |
| H | 1.981808  | -2.330571 | 0.000011  |
| H | -2.260286 | -1.861581 | -0.000025 |
| H | 0.489117  | 2.657754  | 0.000014  |
| H | -3.430531 | 0.320305  | -0.000051 |
| F | -4.196436 | 0.856182  | -0.000076 |

**thy4 O10...HF**  $E=-554.76300$  a.u.

|   |           |           |           |
|---|-----------|-----------|-----------|
| N | 2.055384  | 0.925362  | -0.255712 |
| C | 1.983680  | -0.387763 | -0.084769 |
| N | 0.885894  | -1.092073 | 0.178664  |
| C | -0.231006 | -0.398768 | 0.276233  |
| C | -0.322513 | 0.989671  | 0.127842  |
| C | 0.898453  | 1.588288  | -0.144361 |
| O | 3.116956  | -1.099269 | -0.182059 |
| O | -1.356786 | -1.116012 | 0.552196  |
| C | -1.608630 | 1.753589  | 0.258828  |
| H | -1.425875 | 2.821252  | 0.148690  |
| H | -2.336971 | 1.456213  | -0.496424 |
| H | -2.071750 | 1.588973  | 1.232663  |
| H | 0.951873  | 2.662548  | -0.278921 |
| H | 3.825832  | -0.472210 | -0.374853 |
| H | -1.085681 | -2.042588 | 0.632012  |
| H | -2.937705 | -0.917493 | -0.206450 |
| F | -3.767771 | -0.830842 | -0.631234 |

**thy5 N1...HF**  $E=-554.77137$  a.u.

|   |           |           |           |
|---|-----------|-----------|-----------|
| N | 1.164414  | 0.246510  | 0.000020  |
| C | 0.768538  | -1.016670 | 0.000034  |
| N | -0.494430 | -1.441482 | 0.000013  |
| C | -1.433704 | -0.506927 | 0.000021  |
| C | -1.159441 | 0.870673  | 0.000014  |
| C | 0.188222  | 1.169464  | 0.000008  |
| O | 1.737655  | -1.940173 | -0.000033 |
| O | -2.714213 | -0.908881 | -0.000024 |
| C | -2.243752 | 1.907868  | 0.000004  |
| H | -1.814717 | 2.908290  | -0.000004 |
| H | -2.885077 | 1.810997  | -0.876815 |
| H | -2.885080 | 1.811012  | 0.876821  |
| H | 0.521441  | 2.200082  | -0.000001 |
| H | 1.318051  | -2.809220 | -0.000060 |
| H | -2.719527 | -1.875802 | -0.000038 |
| H | 2.736308  | 0.832134  | -0.000002 |
| F | 3.570222  | 1.303698  | -0.000017 |

|   |           |           |           |
|---|-----------|-----------|-----------|
| H | 2.996685  | -2.274802 | 0.000029  |
| H | 3.582316  | -0.859862 | -0.876699 |
| H | 3.582295  | -0.859857 | 0.876764  |
| H | 0.599051  | -2.530272 | 0.000004  |
| H | -3.367703 | 0.021307  | -0.000034 |
| H | 1.885172  | 2.482273  | 0.000008  |
| F | -4.267726 | -0.404652 | 0.000028  |

**thy4 O10H...F**  $E=-554.24492$  a.u.

|   |           |           |           |
|---|-----------|-----------|-----------|
| N | 2.230449  | -0.020023 | -0.000059 |
| C | 1.366046  | -1.033308 | -0.000160 |
| N | 0.052186  | -1.014333 | -0.000051 |
| C | -0.553560 | 0.209209  | 0.000042  |
| C | 0.281949  | 1.391834  | 0.000019  |
| C | 1.635335  | 1.196366  | 0.000001  |
| O | 1.939151  | -2.280014 | 0.000084  |
| O | -1.812858 | 0.324706  | 0.000039  |
| C | -0.353591 | 2.750096  | 0.000048  |
| H | 0.404533  | 3.536862  | 0.000038  |
| H | -0.996889 | 2.886975  | -0.872515 |
| H | -0.996841 | 2.886953  | 0.872650  |
| H | 2.309994  | 2.049188  | 0.000023  |
| H | 2.887556  | -2.104932 | 0.000130  |
| H | -2.798243 | -0.778282 | -0.000001 |
| F | -3.561774 | -1.408776 | -0.000026 |

**thy5 N3...HF**  $E=-554.77052$  a.u.

|   |           |           |           |
|---|-----------|-----------|-----------|
| N | 0.281236  | -2.040782 | -0.000005 |
| C | -0.802411 | -1.295262 | -0.000044 |
| N | -0.835296 | 0.045728  | -0.000022 |
| C | 0.336712  | 0.689003  | -0.000002 |
| C | 1.561506  | 0.007560  | 0.000010  |
| C | 1.442317  | -1.371206 | 0.000024  |
| O | -1.975713 | -1.946113 | 0.000008  |
| O | 0.334783  | 2.023349  | 0.000006  |
| C | 2.875161  | 0.732578  | 0.000017  |
| H | 3.701102  | 0.023282  | 0.000030  |
| H | 2.974610  | 1.373829  | -0.876524 |
| H | 2.974591  | 1.373838  | 0.876554  |
| H | 2.336396  | -1.984542 | 0.000026  |
| H | -2.696253 | -1.305469 | 0.000021  |
| H | -0.581283 | 2.358848  | -0.000008 |
| H | -2.010946 | 1.113321  | -0.000014 |
| F | -2.463563 | 1.979815  | -0.000006 |

**thy5 O8...HF**  $E=-554.76264$  a.u.

|   |           |           |           |
|---|-----------|-----------|-----------|
| N | 0.692185  | -1.041262 | -0.157917 |
| C | 0.830488  | 0.265238  | -0.133043 |
| N | -0.128470 | 1.184079  | -0.042764 |
| C | -1.368292 | 0.719393  | 0.028819  |
| C | -1.680952 | -0.648342 | 0.012873  |
| C | -0.574954 | -1.475262 | -0.083780 |
| O | 2.103482  | 0.730453  | -0.210518 |
| O | -2.367742 | 1.613016  | 0.121672  |
| C | -3.092866 | -1.149837 | 0.095747  |
| H | -3.113763 | -2.237923 | 0.064374  |
| H | -3.575744 | -0.825254 | 1.018322  |
| H | -3.697343 | -0.772522 | -0.730008 |
| H | -0.706423 | -2.551005 | -0.102725 |
| H | 2.078373  | 1.693997  | -0.161050 |
| H | -1.973946 | 2.495875  | 0.119962  |
| H | 3.652611  | -0.153793 | 0.086464  |
| F | 4.535974  | -0.407110 | 0.255166  |

**thy5 O10...HF**  $E=-554.76094$  a.u.

|   |           |           |           |
|---|-----------|-----------|-----------|
| N | 2.058366  | 0.967055  | -0.268008 |
| C | 2.001837  | -0.341525 | -0.096457 |
| N | 0.907349  | -1.060274 | 0.174030  |
| C | -0.221474 | -0.383229 | 0.277248  |
| C | -0.324275 | 1.001130  | 0.126500  |
| C | 0.893014  | 1.610120  | -0.151696 |
| O | 3.161322  | -1.009383 | -0.205662 |
| O | -1.338870 | -1.112215 | 0.560021  |
| C | -1.616114 | 1.755036  | 0.260307  |
| H | -1.441143 | 2.823786  | 0.148720  |
| H | -2.343994 | 1.452366  | -0.493398 |
| H | -2.075765 | 1.588400  | 1.235446  |
| H | 0.931542  | 2.685274  | -0.287150 |
| H | 2.975574  | -1.945223 | -0.062217 |
| H | -1.063509 | -2.036466 | 0.642723  |
| H | -2.923970 | -0.934210 | -0.201918 |
| F | -3.755143 | -0.873089 | -0.628294 |

**thy5 O8H...F<sup>-</sup>**  $E=-554.23848$  a.u.

|   |           |           |           |
|---|-----------|-----------|-----------|
| N | 0.075892  | -1.763551 | -0.000099 |
| C | 0.947317  | -0.697098 | -0.000401 |
| N | 0.477745  | 0.598555  | -0.000176 |
| C | -0.816102 | 0.795753  | -0.000029 |
| C | -1.784212 | -0.213156 | 0.000009  |
| C | -1.217473 | -1.486855 | 0.000021  |
| O | 2.187927  | -0.913873 | 0.000005  |
| O | -1.231844 | 2.103965  | -0.000028 |
| C | -3.263447 | 0.045785  | 0.000097  |
| H | -3.809266 | -0.900314 | 0.000137  |
| H | -3.586002 | 0.614699  | 0.876864  |
| H | -3.586113 | 0.614689  | -0.876634 |
| H | -1.886082 | -2.348715 | 0.000098  |
| H | 3.172885  | 0.151122  | 0.000248  |
| H | -0.406683 | 2.609758  | -0.000095 |
| F | 3.931182  | 0.802935  | 0.000368  |

**thy5 O10H...F<sup>-</sup>**  $E=-554.24759$  a.u.

|   |           |           |           |
|---|-----------|-----------|-----------|
| N | -2.241886 | -0.165439 | -0.000046 |
| C | -1.310807 | -1.104053 | -0.000119 |
| N | 0.007309  | -0.983483 | -0.000031 |
| C | 0.530521  | 0.275173  | 0.000031  |
| C | -0.391657 | 1.388231  | 0.000004  |
| C | -1.727576 | 1.087712  | -0.000006 |
| O | -1.775593 | -2.393614 | 0.000092  |
| O | 1.781066  | 0.473851  | 0.000026  |
| C | 0.136903  | 2.791878  | 0.000014  |
| H | -0.680412 | 3.516607  | 0.000001  |
| H | 0.767251  | 2.979017  | 0.872798  |
| H | 0.767284  | 2.979023  | -0.872746 |
| H | -2.460890 | 1.890913  | 0.000004  |
| H | -0.972808 | -2.929960 | 0.000138  |
| H | 2.785622  | -0.597132 | 0.000003  |
| F | 3.551989  | -1.230174 | -0.000016 |

**Table S9** Cartesian coordinates of equilibrium geometries for complexes of thymine tautomers with cations.

**thy1 O8...Li<sup>+</sup>**  $E = -461.65456$  a.u.

|    |           |           |           |
|----|-----------|-----------|-----------|
| N  | -0.857997 | -1.301345 | -0.000009 |
| C  | -1.442436 | -0.084750 | 0.000000  |
| N  | -0.597256 | 0.965103  | 0.000006  |
| C  | 0.832681  | 0.911072  | 0.000002  |
| C  | 1.384246  | -0.446715 | -0.000002 |
| C  | 0.523929  | -1.479105 | -0.000009 |
| H  | -1.468814 | -2.102363 | -0.000015 |
| O  | -2.691435 | 0.051352  | -0.000001 |
| H  | -0.994307 | 1.894922  | 0.000012  |
| O  | 1.456647  | 1.941031  | 0.000014  |
| C  | 2.872515  | -0.596258 | -0.000001 |
| H  | 3.164225  | -1.643912 | -0.000005 |
| H  | 3.303813  | -0.108967 | -0.874533 |
| H  | 3.303811  | -0.108974 | 0.874537  |
| H  | 0.844100  | -2.509856 | -0.000015 |
| Li | -4.371124 | 0.389437  | 0.000001  |

**thy1 O8...Na<sup>+</sup>**  $E = -616.43254$  a.u.

|    |           |           |           |
|----|-----------|-----------|-----------|
| N  | 0.277374  | -1.371634 | 0.000003  |
| C  | 0.934482  | -0.184665 | 0.000004  |
| N  | 0.132931  | 0.907443  | -0.000011 |
| C  | -1.293001 | 0.926630  | -0.000032 |
| C  | -1.915710 | -0.399430 | -0.000005 |
| C  | -1.109781 | -1.474879 | 0.000002  |
| H  | 0.844713  | -2.203218 | 0.000011  |
| O  | 2.180143  | -0.112226 | 0.000007  |
| H  | 0.576764  | 1.815139  | -0.000009 |
| O  | -1.866924 | 1.987739  | -0.000002 |
| C  | -3.410262 | -0.473163 | 0.000006  |
| H  | -3.753439 | -1.505267 | 0.000022  |
| H  | -3.817580 | 0.034250  | 0.874547  |
| H  | -3.817589 | 0.034226  | -0.874545 |
| H  | -1.485797 | -2.486784 | 0.000010  |
| Na | 4.258243  | 0.199084  | 0.000012  |

**thy1 O8...K<sup>+</sup>**  $E = -1054.09070$  a.u.

|   |           |           |           |
|---|-----------|-----------|-----------|
| N | 0.241402  | -1.402591 | -0.000010 |
| C | -0.450708 | -0.231117 | 0.000001  |
| N | 0.329523  | 0.880957  | 0.000004  |
| C | 1.751820  | 0.935405  | -0.000006 |
| C | 2.408213  | -0.374019 | -0.000004 |
| C | 1.629194  | -1.469457 | -0.000011 |
| H | -0.305001 | -2.247763 | -0.000016 |
| O | -1.693611 | -0.188873 | 0.000001  |

**thy1 O10...Li<sup>+</sup>**  $E = -461.65852$  a.u.

|    |           |           |           |
|----|-----------|-----------|-----------|
| N  | -1.490607 | 1.085850  | 0.000001  |
| C  | -1.770853 | -0.274204 | -0.000004 |
| N  | -0.604615 | -1.050202 | 0.000005  |
| C  | 0.684798  | -0.597517 | 0.000028  |
| C  | 0.886071  | 0.823668  | 0.000012  |
| C  | -0.231460 | 1.599018  | 0.000006  |
| H  | -2.297680 | 1.692624  | -0.000004 |
| O  | -2.875737 | -0.743756 | -0.000014 |
| H  | -0.760853 | -2.049456 | -0.000005 |
| O  | 1.617843  | -1.440187 | -0.000008 |
| C  | 2.275915  | 1.389713  | 0.000006  |
| H  | 2.248476  | 2.477015  | -0.000004 |
| H  | 2.833915  | 1.071612  | 0.881539  |
| H  | 2.833916  | 1.071594  | -0.881519 |
| H  | -0.171605 | 2.678025  | 0.000002  |
| Li | 2.992239  | -2.454492 | -0.000056 |

**thy1 O10...Na<sup>+</sup>**  $E = -616.43573$  a.u.

|    |           |           |           |
|----|-----------|-----------|-----------|
| N  | -2.238297 | 0.539404  | 0.000005  |
| C  | -1.955934 | -0.818794 | 0.000001  |
| N  | -0.581537 | -1.072068 | 0.000010  |
| C  | 0.435911  | -0.149010 | 0.000033  |
| C  | 0.048074  | 1.240116  | 0.000017  |
| C  | -1.281969 | 1.510276  | 0.000011  |
| H  | -3.218940 | 0.777161  | 0.000001  |
| O  | -2.788143 | -1.687144 | -0.000007 |
| H  | -0.332448 | -2.051641 | 0.000002  |
| O  | 1.617988  | -0.551233 | 0.000001  |
| C  | 1.100173  | 2.309635  | 0.000013  |
| H  | 0.646060  | 3.298200  | 0.000002  |
| H  | 1.739075  | 2.236893  | 0.881146  |
| H  | 1.739085  | 2.236877  | -0.881112 |
| H  | -1.654351 | 2.524706  | 0.000007  |
| Na | 3.645824  | -1.085442 | -0.000051 |

**thy1 O10...K<sup>+</sup>**  $E = -1054.09344$  a.u.

|   |           |           |           |
|---|-----------|-----------|-----------|
| N | -2.726073 | 0.297181  | 0.000013  |
| C | -2.256627 | -1.007435 | 0.000017  |
| N | -0.862035 | -1.067383 | 0.000070  |
| C | 0.022759  | -0.011213 | 0.000140  |
| C | -0.560478 | 1.311955  | 0.000065  |
| C | -1.913457 | 1.393781  | 0.000028  |
| H | -3.729931 | 0.395457  | -0.000020 |
| O | -2.961649 | -1.983320 | -0.000012 |

|   |           |           |           |
|---|-----------|-----------|-----------|
| H | -0.137213 | 1.776712  | 0.000012  |
| O | 2.301470  | 2.010696  | 0.000018  |
| C | 3.904458  | -0.410463 | 0.000001  |
| H | 4.272996  | -1.433903 | 0.000000  |
| H | 4.299677  | 0.106461  | -0.874522 |
| H | 4.299672  | 0.106458  | 0.874527  |
| H | 2.032217  | -2.471039 | -0.000016 |
| K | -4.146292 | 0.133570  | 0.000002  |

**thy2 N1...Li<sup>+</sup>**  $E = -461.61222$  a.u.

|    |           |           |           |
|----|-----------|-----------|-----------|
| N  | 1.206938  | 1.024863  | -0.000020 |
| C  | 1.448646  | -0.266293 | -0.000003 |
| N  | 0.481428  | -1.188718 | 0.000005  |
| C  | -0.915636 | -0.896105 | -0.000013 |
| C  | -1.197994 | 0.539154  | -0.000002 |
| C  | -0.148764 | 1.386101  | -0.000015 |
| O  | 2.674327  | -0.782790 | 0.000005  |
| H  | 0.737225  | -2.169157 | 0.000023  |
| O  | -1.715119 | -1.795698 | 0.000037  |
| C  | -2.630056 | 0.967840  | 0.000013  |
| H  | -2.721270 | 2.051889  | 0.000016  |
| H  | -3.145881 | 0.569185  | -0.873877 |
| H  | -3.145864 | 0.569181  | 0.873910  |
| H  | -0.337665 | 2.455802  | -0.000020 |
| H  | 3.357472  | -0.104043 | 0.000009  |
| Li | 2.142193  | 2.672614  | -0.000056 |

**thy2 O10...Li<sup>+</sup>**  $E = -461.64593$  a.u.

|    |           |           |           |
|----|-----------|-----------|-----------|
| N  | 1.489376  | 1.165509  | -0.000036 |
| C  | 1.656245  | -0.119744 | -0.000025 |
| N  | 0.623289  | -1.001969 | 0.000076  |
| C  | -0.693228 | -0.595108 | 0.000239  |
| C  | -0.910627 | 0.807944  | 0.000057  |
| C  | 0.210089  | 1.608740  | -0.000011 |
| O  | 2.850664  | -0.692465 | -0.000109 |
| H  | 0.820682  | -1.994746 | 0.000044  |
| O  | -1.587885 | -1.484782 | 0.000015  |
| C  | -2.307984 | 1.352880  | -0.000014 |
| H  | -2.295162 | 2.440310  | -0.000140 |
| H  | -2.861868 | 1.026385  | -0.881724 |
| H  | -2.861872 | 1.026588  | 0.881768  |
| H  | 0.099455  | 2.685894  | -0.000095 |
| H  | 3.528117  | 0.000082  | -0.000171 |
| Li | -3.015737 | -2.413196 | -0.000229 |

|   |           |           |           |
|---|-----------|-----------|-----------|
| H | -0.478722 | -2.002195 | 0.000058  |
| O | 1.245966  | -0.242395 | 0.000062  |
| C | 0.333442  | 2.516343  | 0.000049  |
| H | -0.252134 | 3.433155  | -0.000003 |
| H | 0.977504  | 2.530353  | 0.880342  |
| H | 0.977563  | 2.530290  | -0.880202 |
| H | -2.425151 | 2.345546  | -0.000003 |
| K | 3.685224  | -0.592424 | -0.000156 |

**thy2 O8...Li<sup>+</sup>**  $E = -461.59049$  a.u.

|    |           |           |           |
|----|-----------|-----------|-----------|
| N  | 0.854615  | -1.404772 | -0.045097 |
| C  | 1.322569  | -0.230634 | -0.133514 |
| N  | 0.623189  | 0.917761  | -0.131725 |
| C  | -0.812532 | 0.908488  | -0.034866 |
| C  | -1.372681 | -0.438306 | 0.056486  |
| C  | -0.529616 | -1.500594 | 0.027310  |
| O  | 2.721151  | -0.065724 | -0.198106 |
| H  | 1.032155  | 1.807748  | -0.382696 |
| O  | -1.405490 | 1.958834  | -0.055370 |
| C  | -2.860992 | -0.556280 | 0.145830  |
| H  | -3.169354 | -1.597978 | 0.191975  |
| H  | -3.234675 | -0.036352 | 1.028589  |
| H  | -3.334261 | -0.084651 | -0.715985 |
| H  | -0.907529 | -2.512082 | 0.069806  |
| H  | 3.050076  | -0.915015 | -0.538323 |
| Li | 3.737727  | 0.835494  | 1.081571  |

**thy2 N1...Na<sup>+</sup>**  $E = -616.39313$  a.u.

|    |           |           |           |
|----|-----------|-----------|-----------|
| N  | -1.173567 | -0.165395 | 0.100524  |
| C  | -0.780543 | 1.081469  | 0.047250  |
| N  | 0.505799  | 1.449878  | -0.026222 |
| C  | 1.599438  | 0.539183  | -0.051633 |
| C  | 1.177800  | -0.857725 | 0.036883  |
| C  | -0.146207 | -1.113829 | 0.107289  |
| O  | -1.626707 | 2.113149  | 0.053185  |
| H  | 0.736125  | 2.435669  | -0.056077 |
| O  | 2.728130  | 0.955523  | -0.130384 |
| C  | 2.242663  | -1.907395 | 0.046792  |
| H  | 1.816219  | -2.906128 | 0.115597  |
| H  | 2.850021  | -1.843318 | -0.856426 |
| H  | 2.920276  | -1.754827 | 0.887252  |
| H  | -0.473382 | -2.145957 | 0.183260  |
| H  | -2.525533 | 1.825001  | 0.243389  |
| Na | -3.092696 | -1.418311 | -0.139908 |



**thy2 O8...Na<sup>+</sup>**  $E = -616.37794$  a.u.

|    |           |           |           |
|----|-----------|-----------|-----------|
| N  | 0.268361  | -1.562900 | -0.127294 |
| C  | 0.840241  | -0.463234 | -0.412726 |
| N  | 0.258611  | 0.752362  | -0.434299 |
| C  | -1.135421 | 0.919747  | -0.140818 |
| C  | -1.809714 | -0.336292 | 0.174090  |
| C  | -1.090086 | -1.486518 | 0.145298  |
| O  | 2.206158  | -0.448128 | -0.682256 |
| H  | 0.715885  | 1.556808  | -0.841613 |
| O  | -1.616263 | 2.027251  | -0.190581 |
| C  | -3.272664 | -0.273754 | 0.481342  |
| H  | -3.671618 | -1.263809 | 0.689488  |
| H  | -3.458145 | 0.370705  | 1.341249  |
| H  | -3.821642 | 0.159528  | -0.355347 |
| H  | -1.560060 | -2.437894 | 0.351400  |
| H  | 2.415468  | -1.352022 | -0.967084 |
| Na | 3.616182  | 0.531616  | 0.837511  |

**thy2 N1...K<sup>+</sup>**  $E = -1054.05215$  a.u.

|   |           |           |           |
|---|-----------|-----------|-----------|
| N | -0.775031 | 0.253851  | 0.244140  |
| C | -0.082855 | 1.350859  | 0.101370  |
| N | 1.247527  | 1.379250  | -0.074411 |
| C | 2.067066  | 0.218901  | -0.117252 |
| C | 1.312871  | -1.016877 | 0.081523  |
| C | -0.025493 | -0.919797 | 0.249785  |
| O | -0.644703 | 2.563982  | 0.108701  |
| H | 1.717479  | 2.271267  | -0.166289 |
| O | 3.256927  | 0.325073  | -0.292107 |
| C | 2.076355  | -2.302799 | 0.095874  |
| H | 1.417045  | -3.154714 | 0.250817  |
| H | 2.615585  | -2.438533 | -0.842016 |
| H | 2.828029  | -2.292049 | 0.885687  |
| H | -0.595024 | -1.828982 | 0.417045  |
| H | -1.559521 | 2.503741  | 0.404199  |
| K | -3.300869 | -0.715084 | -0.165163 |

**thy3 N3,O8...Li<sup>+</sup>**  $E = -461.65720$  a.u.

|   |           |           |           |
|---|-----------|-----------|-----------|
| N | -0.878874 | -1.445736 | -0.000065 |
| C | -1.513944 | -0.234345 | -0.000329 |
| N | -0.749858 | 0.898658  | -0.000053 |
| C | 0.568896  | 0.794597  | 0.000014  |
| C | 1.275585  | -0.447573 | -0.000050 |
| C | 0.481680  | -1.550684 | -0.000018 |
| O | -2.756281 | -0.139438 | 0.000348  |
| O | 1.307338  | 1.891907  | 0.000064  |
| C | 2.775120  | -0.500413 | -0.000007 |
| H | 3.122010  | -1.531054 | -0.000011 |
| H | 3.183992  | 0.000028  | -0.877498 |

**thy2 O10...Na<sup>+</sup>**  $E = -616.42210$  a.u.

|    |           |           |           |
|----|-----------|-----------|-----------|
| N  | 2.249277  | 0.680109  | -0.000030 |
| C  | 1.937234  | -0.576352 | -0.000019 |
| N  | 0.656504  | -1.026866 | -0.000003 |
| C  | -0.434409 | -0.174130 | -0.000001 |
| C  | -0.117596 | 1.217532  | -0.000010 |
| C  | 1.213161  | 1.557330  | -0.000025 |
| O  | 2.846761  | -1.543307 | -0.000018 |
| H  | 0.482634  | -2.023342 | 0.000008  |
| O  | -1.582759 | -0.674686 | 0.000022  |
| C  | -1.222206 | 2.231747  | -0.000003 |
| H  | -0.817181 | 3.241178  | -0.000012 |
| H  | -1.857387 | 2.127459  | -0.881430 |
| H  | -1.857370 | 2.127466  | 0.881436  |
| H  | 1.500749  | 2.601299  | -0.000034 |
| H  | 3.725849  | -1.136977 | -0.000028 |
| Na | -3.626081 | -1.118418 | 0.000055  |

**thy2 O10...K<sup>+</sup>**  $E = -1054.07927$  a.u.

|   |           |           |           |
|---|-----------|-----------|-----------|
| N | 2.754696  | 0.443317  | -0.000015 |
| C | 2.272063  | -0.757034 | 0.000012  |
| N | 0.942221  | -1.029094 | 0.000135  |
| C | -0.026945 | -0.035085 | 0.000306  |
| C | 0.484063  | 1.301687  | 0.000108  |
| C | 1.846869  | 1.455640  | 0.000018  |
| O | 3.042043  | -1.840661 | -0.000074 |
| H | 0.634390  | -1.992289 | 0.000117  |
| O | -1.230276 | -0.368734 | 0.000123  |
| C | -0.471051 | 2.457548  | 0.000043  |
| H | 0.067960  | 3.402339  | -0.000096 |
| H | -1.115543 | 2.439182  | -0.880594 |
| H | -1.115420 | 2.439373  | 0.880775  |
| H | 2.275247  | 2.450083  | -0.000078 |
| H | 3.967385  | -1.555622 | -0.000151 |
| K | -3.669293 | -0.628632 | -0.000217 |

**thy3 O10...Li<sup>+</sup>**  $E = -461.60359$  a.u.

|   |           |           |           |
|---|-----------|-----------|-----------|
| N | 1.443074  | 1.123983  | 0.000009  |
| C | 1.805066  | -0.255924 | -0.000003 |
| N | 0.718951  | -1.127801 | -0.000004 |
| C | -0.467953 | -0.652232 | 0.000002  |
| C | -0.876413 | 0.707168  | 0.000008  |
| C | 0.179035  | 1.577700  | 0.000017  |
| O | 2.958376  | -0.582415 | -0.000012 |
| O | -1.499397 | -1.598951 | -0.000013 |
| C | -2.318683 | 1.126268  | 0.000006  |
| H | -2.421501 | 2.209300  | 0.000015  |
| H | -2.851663 | 0.797468  | -0.906235 |

H 3.183938 0.000002 0.877523  
H 0.879618 -2.554495 0.000084  
H 0.750661 2.682725 0.000077  
H -1.464778 -2.269358 0.000075  
Li -2.728932 1.704150 -0.000127

**thy3 N3,O8...Na<sup>+</sup>**  $E = -616.43327$  a.u.

N -0.067160 -1.744975 -0.000003  
C -1.024817 -0.755414 -0.000035  
N -0.592790 0.543800 -0.000007  
C 0.703655 0.795327 0.000002  
C 1.728956 -0.199369 -0.000001  
C 1.267945 -1.477326 0.000004  
O -2.230389 -1.042220 0.000030  
O 1.115121 2.057467 0.000012  
C 3.184942 0.163441 0.000007  
H 3.802704 -0.731819 0.000010  
H 3.441260 0.756993 -0.877324  
H 3.441250 0.756992 0.877341  
H 1.925274 -2.334206 0.000018  
H 0.356825 2.656773 0.000013  
H -0.405500 -2.696642 0.000011  
Na -3.107645 0.974382 -0.000018

**thy3 N3,O8...K<sup>+</sup>**  $E = -1054.08768$  a.u.

N -0.551325 1.792734 0.000005  
C 0.514189 0.911838 -0.000004  
N 0.222290 -0.423702 0.000007  
C -1.038104 -0.808492 0.000008  
C -2.168834 0.064703 0.000004  
C -1.849329 1.384999 0.000005  
O 1.673676 1.344205 0.000008  
O -1.306590 -2.111946 0.000012  
C -3.575880 -0.456313 0.000006  
H -4.288996 0.365180 0.000005  
H -3.765433 -1.074862 -0.877095  
H -3.765432 -1.074859 0.877110  
H -2.595270 2.166064 0.000008  
H -0.478247 -2.610200 0.000015  
H -0.317479 2.774808 0.000006  
K 3.330798 -0.556202 -0.000021

**thy4 N3,O8...Li<sup>+</sup>**  $E = -461.63178$  a.u.

N -0.901376 -1.505811 -0.000001  
C -1.381527 -0.305087 -0.000008  
N -0.732757 0.867862 -0.000008  
C 0.603696 0.775791 0.000001  
C 1.273755 -0.463848 0.000009  
C 0.449741 -1.572259 0.000008

H -2.851668 0.797452 0.906237  
H 0.047228 2.650989 0.000022  
H -1.061888 -2.467521 -0.000017  
H 2.222135 1.768007 0.000009  
Li -3.271656 -1.098639 -0.000017

**thy3 O10...Na<sup>+</sup>**  $E = -616.38579$  a.u.

N -2.042515 0.929539 -0.000025  
C -2.150452 -0.489655 -0.000037  
N -0.929211 -1.151101 -0.000019  
C 0.165382 -0.479718 -0.000040  
C 0.319105 0.934027 -0.000038  
C -0.876145 1.597929 -0.000058  
O -3.229020 -1.018231 0.000080  
O 1.324658 -1.246184 0.000014  
C 1.648538 1.632668 -0.000009  
H 1.522077 2.713491 -0.000018  
H 2.234969 1.406209 0.899624  
H 2.235009 1.406194 -0.899613  
H -0.936620 2.677523 -0.000045  
H 1.000396 -2.163445 0.000019  
H -2.922509 1.425856 0.000011  
Na 3.478644 -0.633734 0.000062

**thy3 O10...K<sup>+</sup>**  $E = -1054.04635$  a.u.

N -2.572464 0.786123 -0.000015  
C -2.531524 -0.634432 0.000002  
N -1.250629 -1.166278 -0.000028  
C -0.225795 -0.386907 -0.000067  
C -0.222673 1.036279 -0.000043  
C -1.479512 1.571531 -0.000055  
O -3.551358 -1.272605 0.000045  
O 0.999555 -1.029386 -0.000013  
C 1.025026 1.870985 -0.000009  
H 0.781169 2.931552 -0.000023  
H 1.633175 1.694680 0.893289  
H 1.633222 1.694666 -0.893272  
H -1.651327 2.638970 -0.000044  
H 0.756540 -1.971365 -0.000013  
H -3.498738 1.188493 0.000010  
K 3.585731 -0.412880 0.000059

**thy4 O10...Li<sup>+</sup>**  $E = -461.60582$  a.u.

N 1.449364 1.190985 0.000013  
C 1.673626 -0.122607 0.000034  
N 0.730553 -1.073321 0.000004  
C -0.497349 -0.636378 -0.000003  
C -0.896467 0.694217 0.000007  
C 0.179929 1.581299 0.000009

|                                                       |           |           |           |
|-------------------------------------------------------|-----------|-----------|-----------|
| O                                                     | -2.742720 | -0.103075 | -0.000015 |
| O                                                     | 1.336626  | 1.883625  | 0.000002  |
| C                                                     | 2.771305  | -0.545180 | 0.000018  |
| H                                                     | 3.096906  | -1.582606 | 0.000022  |
| H                                                     | 3.190803  | -0.052131 | -0.877037 |
| H                                                     | 3.190793  | -0.052126 | 0.877075  |
| H                                                     | 0.872331  | -2.568351 | 0.000013  |
| H                                                     | -3.207943 | -0.951265 | -0.000014 |
| H                                                     | 0.784339  | 2.675236  | -0.000004 |
| Li                                                    | -2.513785 | 1.805330  | -0.000020 |
| <b>thy4 N3,O8...Na<sup>+</sup> E= -616.41128 a.u.</b> |           |           |           |
| N                                                     | -0.077555 | -1.829654 | 0.000000  |
| C                                                     | -0.891153 | -0.814619 | -0.000007 |
| N                                                     | -0.597945 | 0.491039  | -0.000005 |
| C                                                     | 0.710055  | 0.774806  | 0.000004  |
| C                                                     | 1.708735  | -0.215863 | 0.000012  |
| C                                                     | 1.233199  | -1.512809 | 0.000011  |
| O                                                     | -2.240021 | -1.056116 | -0.000012 |
| O                                                     | 1.097174  | 2.050623  | 0.000007  |
| C                                                     | 3.167363  | 0.133886  | 0.000021  |
| H                                                     | 3.775542  | -0.767707 | 0.000027  |
| H                                                     | 3.429705  | 0.725854  | -0.876966 |
| H                                                     | 3.429693  | 0.725857  | 0.877010  |
| H                                                     | 1.921536  | -2.348045 | 0.000015  |
| H                                                     | -2.376601 | -2.014175 | -0.000010 |
| H                                                     | 0.334907  | 2.641776  | 0.000002  |
| Na                                                    | -2.928426 | 1.114388  | -0.000023 |
| <b>thy4 N3,O8...K<sup>+</sup> E= -1054.06735 a.u.</b> |           |           |           |
| N                                                     | -0.613032 | 1.903441  | 0.000005  |
| C                                                     | 0.361584  | 1.034449  | -0.000004 |
| N                                                     | 0.283505  | -0.298639 | -0.000001 |
| C                                                     | -0.960646 | -0.787685 | 0.000008  |
| C                                                     | -2.110216 | 0.021140  | 0.000016  |
| C                                                     | -1.852717 | 1.378737  | 0.000016  |
| O                                                     | 1.642189  | 1.515247  | -0.000008 |
| O                                                     | -1.130926 | -2.113390 | 0.000010  |
| C                                                     | -3.491595 | -0.563522 | 0.000024  |
| H                                                     | -4.239958 | 0.225779  | 0.000029  |
| H                                                     | -3.653837 | -1.190675 | -0.876813 |
| H                                                     | -3.653826 | -1.190675 | 0.876864  |
| H                                                     | -2.668550 | 2.090331  | 0.000020  |
| H                                                     | 1.582556  | 2.481404  | -0.000006 |
| H                                                     | -0.276000 | -2.559424 | 0.000004  |
| K                                                     | 3.128828  | -0.673891 | -0.000026 |

|                                                     |           |           |           |
|-----------------------------------------------------|-----------|-----------|-----------|
| O                                                   | 2.922047  | -0.559830 | -0.000037 |
| O                                                   | -1.486533 | -1.620283 | -0.000009 |
| C                                                   | -2.339058 | 1.115506  | 0.000008  |
| H                                                   | -2.437949 | 2.199062  | 0.000013  |
| H                                                   | -2.872699 | 0.788501  | -0.906721 |
| H                                                   | -2.872701 | 0.788492  | 0.906733  |
| H                                                   | 0.005879  | 2.651439  | 0.000009  |
| H                                                   | 3.517335  | 0.203392  | -0.000060 |
| H                                                   | -1.028740 | -2.477142 | -0.000012 |
| Li                                                  | -3.259578 | -1.109569 | -0.000014 |
| <b>thy4 O10...Na<sup>+</sup> E= -616.38783 a.u.</b> |           |           |           |
| N                                                   | 2.051738  | 1.008699  | -0.000004 |
| C                                                   | 2.044506  | -0.322602 | -0.000021 |
| N                                                   | 0.954417  | -1.095003 | -0.000016 |
| C                                                   | -0.191349 | -0.462540 | -0.000005 |
| C                                                   | -0.350131 | 0.920202  | 0.000005  |
| C                                                   | 0.864235  | 1.605349  | 0.000003  |
| O                                                   | 3.202722  | -0.968583 | -0.000005 |
| O                                                   | -1.309047 | -1.282999 | -0.000003 |
| C                                                   | -1.682078 | 1.615599  | 0.000017  |
| H                                                   | -1.555380 | 2.696465  | 0.000024  |
| H                                                   | -2.267984 | 1.389711  | -0.900342 |
| H                                                   | -2.267974 | 1.389698  | 0.900380  |
| H                                                   | 0.873566  | 2.689578  | 0.000016  |
| H                                                   | 3.915974  | -0.314832 | 0.000007  |
| H                                                   | -0.955168 | -2.187882 | -0.000011 |
| Na                                                  | -3.458783 | -0.652909 | 0.000012  |
| <b>thy4 O10...K<sup>+</sup> E= -1054.04803 a.u.</b> |           |           |           |
| N                                                   | 2.583670  | 0.871936  | 0.000000  |
| C                                                   | 2.442410  | -0.450775 | -0.000008 |
| N                                                   | 1.282678  | -1.111482 | -0.000009 |
| C                                                   | 0.200163  | -0.370518 | -0.000003 |
| C                                                   | 0.183304  | 1.022701  | 0.000006  |
| C                                                   | 1.458966  | 1.582417  | 0.000011  |
| O                                                   | 3.533614  | -1.209112 | -0.000018 |
| O                                                   | -0.986742 | -1.076784 | -0.000008 |
| C                                                   | -1.069933 | 1.850011  | 0.000008  |
| H                                                   | -0.830002 | 2.911460  | 0.000012  |
| H                                                   | -1.676785 | 1.671631  | -0.894097 |
| H                                                   | -1.676783 | 1.671626  | 0.894114  |
| H                                                   | 1.575384  | 2.660378  | 0.000010  |
| H                                                   | 4.305100  | -0.625664 | -0.000017 |
| H                                                   | -0.708438 | -2.007631 | -0.000015 |
| K                                                   | -3.564071 | -0.427412 | 0.000009  |

**thy5 N1,O8...Li<sup>+</sup>**  $E = -461.64049$  a.u.

|    |           |           |           |
|----|-----------|-----------|-----------|
| N  | -1.170172 | -1.081104 | 0.000006  |
| C  | -1.356465 | 0.228971  | 0.000001  |
| N  | -0.462328 | 1.184670  | -0.000008 |
| C  | 0.808821  | 0.773997  | -0.000009 |
| C  | 1.181095  | -0.591455 | 0.000004  |
| C  | 0.127323  | -1.475990 | 0.000008  |
| O  | -2.690540 | 0.543525  | -0.000010 |
| O  | 1.766013  | 1.686927  | -0.000002 |
| C  | 2.619547  | -1.013564 | 0.000011  |
| H  | 2.704234  | -2.097844 | 0.000020  |
| H  | 3.139030  | -0.626074 | -0.876489 |
| H  | 3.139027  | -0.626060 | 0.876506  |
| H  | 0.302171  | -2.542955 | 0.000015  |
| H  | -2.824840 | 1.500723  | -0.000021 |
| H  | 1.377135  | 2.574063  | -0.000004 |
| Li | -3.098319 | -1.427393 | -0.000003 |

**thy5 N1,O8...Na<sup>+</sup>**  $E = -616.41978$  a.u.

|    |           |           |           |
|----|-----------|-----------|-----------|
| N  | -0.975026 | -0.718977 | 0.000003  |
| C  | -0.889885 | 0.600000  | -0.000002 |
| N  | 0.193616  | 1.346357  | -0.000006 |
| C  | 1.350143  | 0.685089  | -0.000001 |
| C  | 1.432497  | -0.725469 | 0.000006  |
| C  | 0.214947  | -1.367397 | 0.000007  |
| O  | -2.105612 | 1.224112  | -0.000012 |
| O  | 2.477463  | 1.383867  | -0.000005 |
| C  | 2.750416  | -1.440169 | 0.000011  |
| H  | 2.605270  | -2.518224 | 0.000016  |
| H  | 3.340603  | -1.171595 | -0.876340 |
| H  | 3.340601  | -1.171587 | 0.876361  |
| H  | 0.168311  | -2.448149 | 0.000012  |
| H  | -1.974853 | 2.181926  | -0.000018 |
| H  | 2.273592  | 2.330398  | -0.000010 |
| Na | -3.309743 | -0.815508 | 0.000001  |

**thy5 N1,O8...K<sup>+</sup>**  $E = -1054.07519$  a.u.

|   |           |           |           |
|---|-----------|-----------|-----------|
| N | -0.638608 | -0.544678 | 0.000014  |
| C | -0.416585 | 0.757541  | 0.000030  |
| N | 0.744951  | 1.384342  | 0.000013  |
| C | 1.825077  | 0.607941  | 0.000018  |
| C | 1.759621  | -0.801866 | 0.000011  |
| C | 0.479161  | -1.308991 | 0.000006  |
| O | -1.545053 | 1.523943  | -0.000034 |
| O | 3.021014  | 1.187618  | -0.000017 |
| C | 2.994420  | -1.652682 | 0.000003  |
| H | 2.735203  | -2.709319 | -0.000001 |
| H | 3.610067  | -1.449014 | -0.876314 |

**thy5 O10...Li<sup>+</sup>**  $E = -461.60232$  a.u.

|    |           |           |           |
|----|-----------|-----------|-----------|
| N  | 1.424328  | 1.247188  | -0.000001 |
| C  | 1.684103  | -0.056187 | -0.000011 |
| N  | 0.764231  | -1.036452 | -0.000011 |
| C  | -0.480083 | -0.636618 | -0.000003 |
| C  | -0.910085 | 0.680839  | 0.000004  |
| C  | 0.146296  | 1.596400  | 0.000001  |
| O  | 2.962811  | -0.398682 | -0.000006 |
| O  | -1.444580 | -1.645105 | -0.000001 |
| C  | -2.361976 | 1.069635  | 0.000015  |
| H  | -2.483314 | 2.150888  | 0.000022  |
| H  | -2.889179 | 0.732809  | -0.907156 |
| H  | -2.889169 | 0.732799  | 0.907188  |
| H  | -0.059567 | 2.661301  | 0.000014  |
| H  | 3.043584  | -1.361552 | -0.000008 |
| H  | -0.973241 | -2.493441 | -0.000007 |
| Li | -3.228136 | -1.157359 | 0.000015  |

**thy5 O10...Na<sup>+</sup>**  $E = -616.38431$  a.u.

|    |           |           |           |
|----|-----------|-----------|-----------|
| N  | 2.041904  | 1.059039  | 0.000001  |
| C  | 2.061750  | -0.268347 | 0.000002  |
| N  | 0.983366  | -1.066015 | -0.000003 |
| C  | -0.180243 | -0.459347 | 0.000002  |
| C  | -0.361794 | 0.917355  | 0.000007  |
| C  | 0.842995  | 1.625168  | 0.000006  |
| O  | 3.260559  | -0.837712 | -0.000024 |
| O  | -1.283467 | -1.299820 | 0.000000  |
| C  | -1.703999 | 1.592926  | 0.000011  |
| H  | -1.591472 | 2.675371  | 0.000014  |
| H  | -2.286813 | 1.360973  | -0.901063 |
| H  | -2.286810 | 1.360967  | 0.901084  |
| H  | 0.827950  | 2.709763  | 0.000005  |
| H  | 3.160485  | -1.798382 | -0.000034 |
| H  | -0.921522 | -2.200396 | -0.000004 |
| Na | -3.440699 | -0.673249 | 0.000004  |

**thy5 O10...K<sup>+</sup>**  $E = -1054.04450$  a.u.

|   |           |           |           |
|---|-----------|-----------|-----------|
| N | 2.578120  | 0.921335  | -0.000007 |
| C | 2.463712  | -0.400003 | -0.000016 |
| N | 1.312714  | -1.086659 | -0.000001 |
| C | 0.210190  | -0.369677 | 0.000009  |
| C | 0.170604  | 1.019975  | 0.000012  |
| C | 1.439022  | 1.602775  | 0.000021  |
| O | 3.601138  | -1.088918 | -0.000025 |
| O | -0.964613 | -1.096683 | 0.000003  |
| C | -1.094753 | 1.828682  | 0.000007  |
| H | -0.868920 | 2.893200  | 0.000010  |
| H | -1.698884 | 1.643540  | -0.894796 |

|   |           |           |           |
|---|-----------|-----------|-----------|
| H | 3.610074  | -1.449022 | 0.876317  |
| H | 0.321991  | -2.379874 | -0.000001 |
| H | -1.281072 | 2.453922  | -0.000057 |
| H | 2.911635  | 2.149356  | -0.000028 |
| K | -3.384745 | -0.515676 | -0.000005 |

|   |           |           |           |
|---|-----------|-----------|-----------|
| H | -1.698888 | 1.643537  | 0.894807  |
| H | 1.531541  | 2.683487  | -0.000003 |
| H | 3.400304  | -2.033371 | -0.000023 |
| H | -0.678618 | -2.024105 | -0.000001 |
| K | -3.549854 | -0.434459 | 0.000003  |

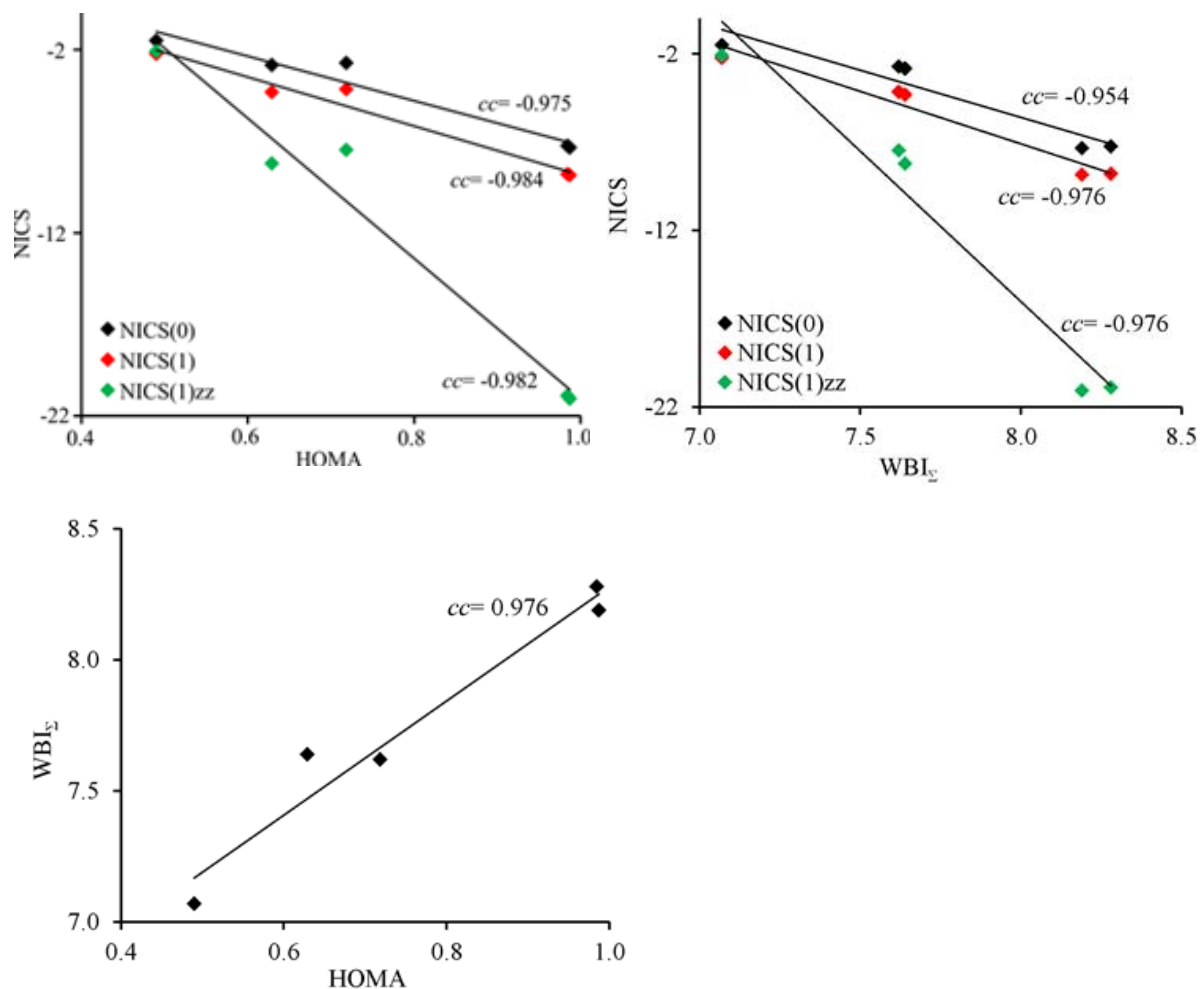

**Figure S1.** Correlations between aromaticity indices: NICS's, HOMA and WBI<sub>z</sub>.

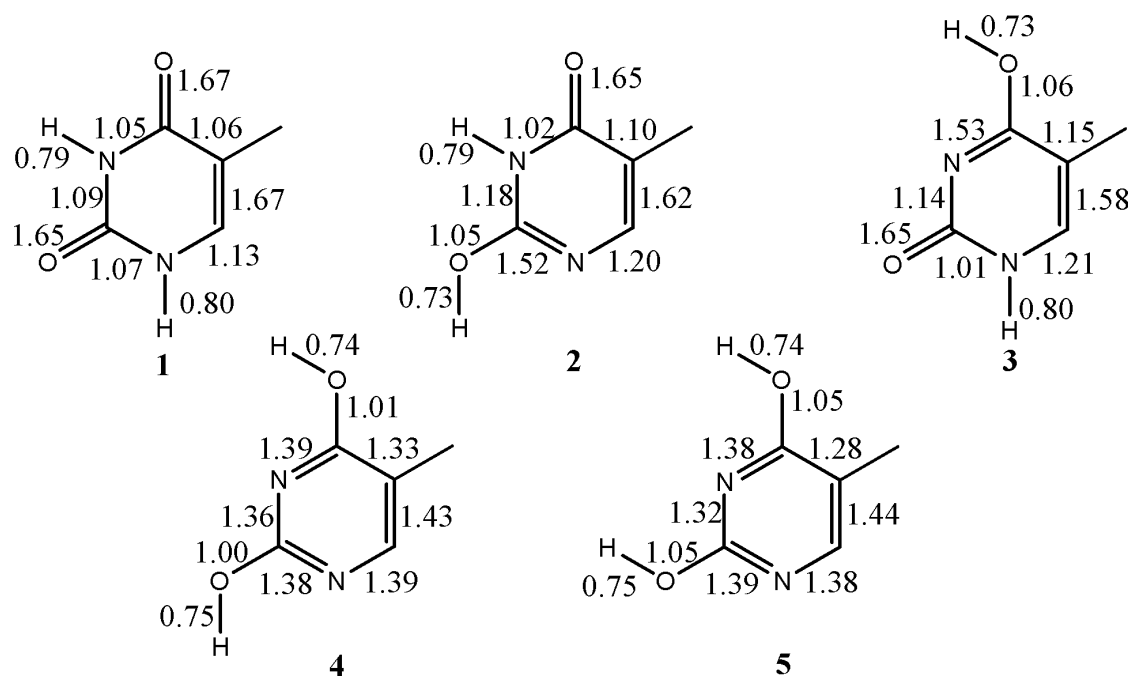

**Figure S2.** Wiberg bond indices for the most stable thymine tautomers.

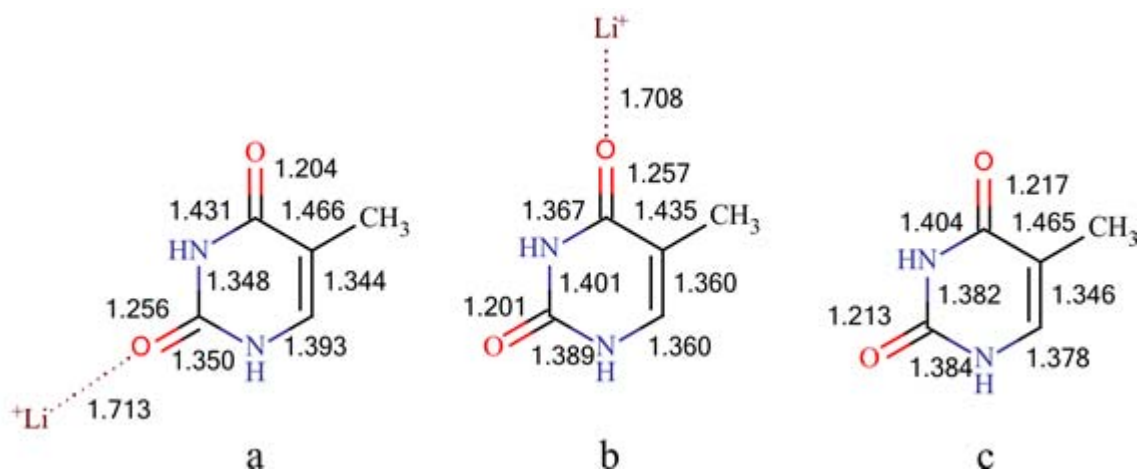

**Figure S3.** Structural parameters of thyl(c) and its complexes with  $\text{Li}^+$  (a,b).

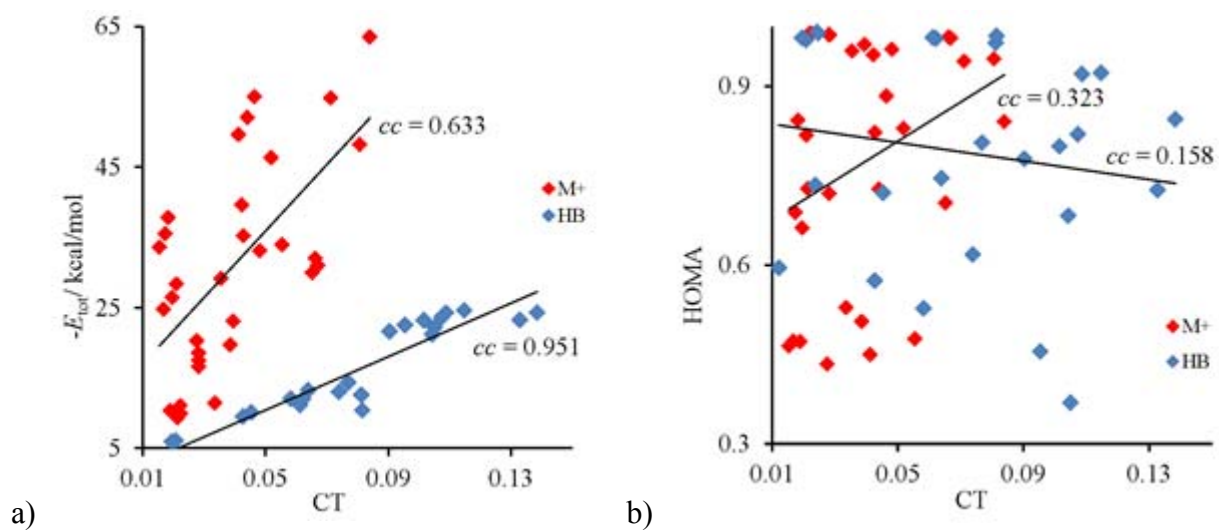

**Figure S4.** Relationships total energy of interactions,  $E_{\text{tot}}$  (a) and aromaticity index HOMA (b) against the amount of charge transfer, CT, for the studied complexes of thymine
